# Supplementary material for: Breaking the heavy-atom paradigm: weak-donor-engineered triplet harvesting in BODIPY photosensitizers for immunogenic pyroptosis therapy
Source: Royal Society of Chemistry journal article supplement (doi:10.1039/d5sc03466c), 2025-01-01
Supplement: d5sc03466c1.pdf [file d5sc03466c1.pdf]

1 **Supporting Information**

2 **Breaking the Heavy-Atom Paradigm: Weak-Donor-Engineered Triplet**  
3 **Harvesting in BODIPY Photosensitizers for Immunogenic Pyroptosis Therapy**

4 Hyeong Seok Kim,<sup>1,2+</sup> Hyeonji Rha,<sup>1+</sup> Mohammad Izadyar,<sup>3,5+</sup> Supphachok Chanmungkalakul,<sup>3</sup> Haiqiao Huang,<sup>4</sup> Yi  
5 Young Kang,<sup>2</sup> Jae-Won Ka,<sup>2</sup> Yunjie Xu,<sup>1\*</sup> Mingle Li,<sup>4\*</sup> Xiaogang Liu,<sup>3\*</sup> and Jong Seung Kim<sup>1\*</sup>

6  
7 **Affiliations**

8 <sup>1</sup> Department of Chemistry, Korea University, Seoul, 02841, Korea

9 <sup>2</sup> Advanced Functional Polymers Research Center, Korea Research Institute of Chemical Technology, Daejeon, 34114,  
10 Korea.

11 <sup>3</sup> Fluorescence Research Group, Singapore University of Technology and Design, 487372, Singapore

12 <sup>4</sup> College of Materials Science and Engineering, Shenzhen University, Shenzhen, 518060, China

13 <sup>5</sup> Research Center for Modeling and Computational Sciences, Faculty of Science, Ferdowsi University of Mashhad,  
14 Mashhad 9177948974, Iran

15  
16 <sup>+</sup> These authors contribute equally to this work.

17 <sup>\*</sup> Authors to whom correspondence should be addressed.

18 Prof. Jong Seung Kim, E-mail: jongskim@korea.ac.kr

19 Prof. Xiaogang Liu, E-mail: xiaogang\_liu@sutd.edu.sg

20 Prof. Mingle Li, E-mail: limingle@szu.edu.cn

21 Dr. Yunjie Xu, E-mail: xuyunjie87@korea.ac.k

22

23 **This file includes**

24 1. Materials and Instruments

25 1.1 Materials

26 1.2 Instruments

27 2. Synthesis of thiophene-bridged heavy-atom-free BODIPY photosensitizers (PSs)

28 2.1 Overall synthetic schemes

29 2.2 Detailed synthetic procedures

30 2.2.1. Synthesis of donor-thiophene units (TPA-th, DP-Bth, and Cbz-Bth)

31 2.2.2. Synthesis of thiophene-bridged BODIPY PSs

32 Supporting Figures: Fig. S1 to S17

33 3. Additional experimental details and methods

34 Supporting Figures: Fig. S18 to S37

35 4. Reference

## 36 1. Materials and Instruments

### 37 1.1. Materials

#### 38 Materials and Instruments for Chemical Synthesis and Characterization

39  $\beta$ -Nicotinamide adenine dinucleotide reduced disodium salt hydrate (NADH, CAS No. 606-68-8) was  
40 purchased from Sigma Aldrich. 5-Bromobenzothiophene (98%, CAS No. 4923-87-9) and sodium *tert*-  
41 butoxide (97%, CAS No. 865-48-5), tris(dibenzylideneacetone)dipalladium, (97%, CAS No. 51364-  
42 51-3), anhydrous toluene (99.8%, CAS No. 108-88-3, packaged under Argon), *N*-iodosuccinimide  
43 (97%, CAS No. 516-12-1), 1,3-dibenzofuran (97%, CAS No. 5471-63-6), trimethyl borate, (99%, CAS  
44 No. 121-43-7), and 2,3-dichloro-5,6-dicyano-1,4-benzoquinone(CAS No. 84-58-2) were purchased  
45 from Alfa Aesar. 2,4-Dimethylpyrrole (CAS No. 625-82-1) was purchased from carbosynth. 2-  
46 Bromothiophene (98%, CAS No. 1003-09-4), 4-bromotriphenylamine (97%, CAS No. 35809-26-4),  
47 potassium carbonate (CAS No. 584-08-7), and trifluoroacetic acid (CAS No. 76-05-1) were purchased  
48 from TCI (Tokyo Chemical Industry). Tetrakis(triphenylphosphine)palladium(0) (CAS No. 14221-01-  
49 3) was purchased from SY Innovation. The calcein-AM/PI Double Stain Kit was obtained from  
50 Invitrogen. The cellular NAD/NADH assay kit (colorimetric) was purchased from Promega (catalog  
51 nos. G9071). The FITC annexin V detection kit was purchased from BD Pharmingen™ (Cat No.  
52 556547). The nuclear imaging agent Hoechst 33342 was purchased from Invitrogen (Cat No. H3570).  
53 9,10- anthracenediyl-bis(methylene) dimalononic acid (CAS No. 307554-62-7), the superoxide assay kit  
54 (dihydrorhodamine 123, DHR123) for superoxide radical ( $O_2^{\cdot-}$ ) detection, 2'-7'dichlorofluorescein  
55 diacetate (DCFH-DA) were purchased from Sigma-Aldrich. The singlet oxygen trapping agent 2,2,6,6-  
56 tetramethyl-4-piperidine (TEMP) and the free radicals trapping agent 5,5-dimethyl-1-pyrroline *N*-  
57 oxide (DMPO) were purchased commercially from TCI.

### 58 1.2. Instruments

59 Fluorescence and UV-vis absorption spectra were recorded using a Shimadzu RF-5301PC fluorometer  
60 and an Agilent 8453 spectrophotometer, respectively.  $^1H$  and  $^{13}C$  NMR spectra were collected on a  
61 Bruker 500 MHz spectrometer. Confocal laser scanning microscope (CLSM) images were obtained  
62 using an Olympus FV3000 confocal laser scanning microscope. The absorbance measurements for cell  
63 studies were determined using a SpectraMax Gemini EM microplate reader (Molecular Devices, San  
64 Jose, CA, USA). Electron spin resonance (EPR) experiments were performed on an ESR Spectrometer  
65 (JEOL, JEX-X320).

## 66 2. Synthesis of thiophene-bridged heavy-atom-free BODIPY photosensitizers (PSs)

### 67 2.1. Overall synthetic schemes

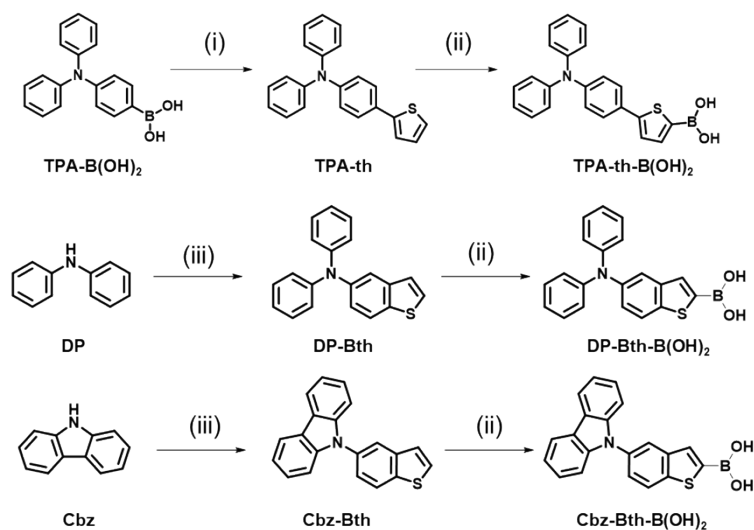

68 **Scheme S1.** Synthesis of thiophene-conjugated donors (TPA-th, DP-Bth, and Cbz-Bth). Reagents and  
 69 conditions: (i) 2-Bromothiophene, Potassium carbonate, Tetrakis(triphenylphosphine)palladium(0),  
 70 THF, reflux 3 h; (ii) Butyllithium, Trimethyl borate, Hydrochloric acid. Tetrahydrofuran, -78 °C; iii)  
 71 5-bromo-benzothiophene, sodium tert-butoxide, Tris(dibenzylideneacetone)dipalladium, toluene,  
 72 reflux, 2 h.

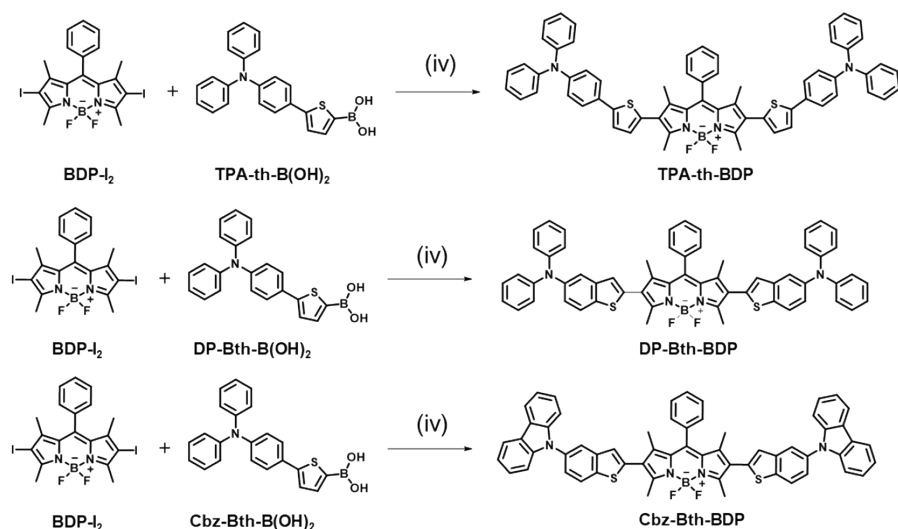

74 **Scheme S2.** Synthesis of thiophene-bridged BODIPY PSs (TPA-th-BDP, DP-Bth-BDP, and Cbz-  
 75 Bth-BDP). Reagents and conditions: (iv) Potassium carbonate,  
 76 Tetrakis(triphenylphosphine)palladium(0). Toluene, Ethanol, Water (v/v/v = 2:2:1), reflux 3 h.

## 79 2.2. Detailed synthetic procedures

### 80 2.2.1. Synthesis of donor-thiophene units (TPA-th, DP-Bth, and Cbz-Bth)

81 TPA-B(OH)<sub>2</sub> was synthesized from the previously reported method.<sup>[1]</sup>

82 TPA-th-B(OH)<sub>2</sub> was synthesized from the previously reported method.<sup>[2]</sup>

83 DP-Bth was synthesized from the previously reported method.<sup>[3]</sup>

84 Cbz-Bth was synthesized from the previously reported method.<sup>[3]</sup>

#### 85 DP-Bth-B(OH)<sub>2</sub>

86 A solution of DP-Bth (1 g, 3.32 mmol) in anhydrous THF (20 mL) was cooled to -78 °C under an  
87 argon atmosphere. Then, *n*-butyllithium (2.5 M in hexane, 3.65 mmol) was then slowly added dropwise  
88 to the mixture. The reaction mixture was stirred for one hour at -78 °C. After stirring, trimethyl borate  
89 (0.43 mL, 3.98 mmol) was added to the mixture at once, and the mixture was allowed to warm to room  
90 temperature overnight. Then the reaction was quenched with 1 *N* aqueous hydrochloride acid solution,  
91 and dichloromethane was used to extract the mixture. The organic layer was washed with brine,  
92 combined and dried over magnesium sulfate. The solvent was removed, and the residue was  
93 recrystallized using a small amounts of dichloromethane, followed by the addition of hexane to yield  
94 white-yellowish powder (82% of yield). <sup>1</sup>H NMR (500 MHz, DMSO) δ 8.48 (s, 1H), 7.90 (d, *J* = 8.7  
95 Hz, 1H), 7.80 (s, 1H), 7.52 (d, *J* = 2.0 Hz, 1H), 7.31 – 7.26 (m, 4H), 7.10 – 7.08 (m, 1H), 7.03 – 6.98  
96 (m, 6H). <sup>13</sup>C NMR (126 MHz, DMSO) δ 148.10, 144.48, 142.29, 138.67, 132.90, 129.94, 123.99,  
97 123.93, 123.71, 123.57, 122.96, 120.08. LC-MS calcd for C<sub>20</sub>H<sub>16</sub>BNO<sub>2</sub>S (M), [M+H]<sup>+</sup> = 345.1, found  
98 346.1

#### 99 Cbz-Bth-B(OH)<sub>2</sub>

100 A solution of Cbz-Bth (1 g, 3.34 mmol) in anhydrous THF (20 mL) was cooled to -78 °C under an  
101 argon atmosphere. Then, *n*-butyllithium (2.5 M in hexane, 3.67 mmol) was slowly added dropwise to  
102 the mixture. The reaction mixture was stirred for one hour at -78 °C. After stirring, trimethyl borate  
103 (0.43 mL, 4.01 mmol) was added to the mixture in a single portion, and the reaction was allowed to  
104 warm to room temperature overnight. Then the reaction was quenched with 1 *N* aqueous hydrochloric  
105 solution, and the mixture was extracted with dichloromethane. The organic layer was washed with  
106 brine, combined, and dried over magnesium sulfate. After solvent removal, the residue was  
107 recrystallized using a small amount of dichloromethane, followed by the addition of hexane, to yield  
108 a white-yellowish powder (77% of yield). <sup>1</sup>H NMR (500 MHz, DMSO) δ 8.27 (m, 3H), 8.16 (d, *J* =  
109 1.9 Hz, 1H), 7.96 (d, *J* = 5.4 Hz, 1H), 7.58 (m, 2H), 7.43 (ddd, *J* = 18.0, 12.5, 4.5 Hz, 4H), 7.30 (m,  
110 2H). <sup>13</sup>C NMR (126 MHz, DMSO) δ 142.31, 142.26, 141.08, 133.72, 133.31, 126.73, 124.61, 124.30,  
111 123.11, 122.70, 120.99, 120.43, 110.13. C<sub>20</sub>H<sub>14</sub>BNO<sub>2</sub>S, [M+H]<sup>+</sup> = 343.1, found 344.1

## 112 2.2.2. Synthesis of thiophene-bridged BODIPY PSs

### 113 Synthesis of BDP-I<sub>2</sub>

114 BDP-I<sub>2</sub> was synthesized from the previously reported method.<sup>[4]</sup>

### 115 Synthesis of TPA-BDP

116 TPA-BDP was synthesized from the previously reported method.<sup>[5]</sup>

### 117 Synthesis of TPA-th-BDP

118 TPA-th-BDP was synthesized using the Suzuki coupling reaction. A solution of BDP-I<sub>2</sub> (300 mg, 0.52  
119 mmol), compound **1** (452 mg, 1.56 mmol), tetrakis(triphenylphosphine)palladium(0) (23 mg, 0.02  
120 mmol), and potassium carbonate (715 mg, 5.2 mmol) in 50 mL of a degassed toluene/ethanol/water  
121 mixture (2:2:1 v/v/v) was heated to reflux for 24 h under nitrogen. After cooling to room temperature  
122 for 3 h, the toluene layer was separated from the aqueous layer. The organic layer was washed  
123 successively with dichloromethane and dried over anhydrous magnesium sulfate. Then, the solvent  
124 was evaporated under reduced pressure. The residue was purified by silica-gel column chromatography  
125 (DCM: Hex = 1: 1). Finally, TPA-th-BDP was obtained as a Blue-violet solid in a 47.5% yield.

### 126 Synthesis of DP-Bth-BDP

127 DP-Bth-BDP was synthesized using the Suzuki coupling reaction. A solution of BDP-I<sub>2</sub> (300 mg, 0.52  
128 mmol), compound **5** (539 mg, 1.56 mmol), tetrakis(triphenylphosphine)palladium(0) (23 mg, 0.02  
129 mmol), and potassium carbonate (715 mg, 5.2 mmol) in 50 mL of a degassed toluene/ethanol/water  
130 mixture (2:2:1 v/v/v) was heated to reflux for 24 h under nitrogen. The reaction mixture was cooled to  
131 room temperature for 3 h, and the toluene layer was separated from the aqueous layer. The organic  
132 layer was washed successively with dichloromethane and dried over anhydrous magnesium sulfate.  
133 Then, the solvent was evaporated under reduced pressure. The crude was purified by silica-gel column  
134 chromatography (DCM: Hex = 1: 1). Finally, DP-Bth-BDP was obtained as a deep-violet solid in a  
135 47.5% yield. <sup>1</sup>H NMR (500 MHz, CDCl<sub>3</sub>) δ 7.68 (d, *J* = 8.7 Hz, 5H), 7.51 (s, 2H), 7.47 (d, *J* = 2.1 Hz,  
136 2H), 7.38 (d, *J* = 1.2 Hz, 6H), 7.24 (dd, *J* = 8.5, 7.4 Hz, 9H), 7.15 – 7.14 (m, 1H), 7.13 – 7.12 (m, 1H),  
137 7.10 (dd, *J* = 8.6, 1.1 Hz, 8H), 7.01 (d, *J* = 7.3 Hz, 4H), 6.90 (s, 2H), 2.65 (s, 6H), 1.43 (s, 6H). <sup>13</sup>C  
138 NMR (126 MHz, CDCl<sub>3</sub>) δ 206.94, 147.98, 145.05, 141.19, 135.97, 135.39, 135.22, 135.17, 129.33,  
139 129.22, 127.90, 127.65, 124.35, 123.94, 122.67, 122.59, 119.08, 77.27, 77.02, 76.76, 53.40, 31.03,  
140 13.03. LC-MS calcd for C<sub>59</sub>H<sub>45</sub>BF<sub>2</sub>N<sub>4</sub>S<sub>2</sub>, [M+H]<sup>+</sup> = 922.31, found 922.84.

### 141 Synthesis of Cbz-Bth-BDP

142 Cbz-Bth-BDP was synthesized using the Suzuki coupling reaction. A solution of BDP-I<sub>2</sub> (300 mg,  
143 0.52 mmol), compound **7** (535 mg, 1.56 mmol), tetrakis(triphenylphosphine)palladium(0) (23 mg, 0.02  
144 mmol), and potassium carbonate (715 mg, 5.2 mmol) in 50 mL of a degassed toluene/ethanol/water

145 mixture (2:2:1 v/v/v) was heated to reflux for 24 h under nitrogen. After the reaction, the mixture was  
146 allowed to cool to room temperature over 3 h, and the toluene layer was separated from the aqueous  
147 layer. The organic layer was then washed successively with dichloromethane and dried over anhydrous  
148 magnesium sulfate. The solvent was evaporated under reduced pressure, and the residue was purified  
149 by silica-gel column chromatography (DCM: Hex = 1: 1) mixture as the eluent. Finally, Cbz-Bth-BDP  
150 was obtained as a magenta solid in 37% yield. <sup>1</sup>H NMR (500 MHz, CD<sub>2</sub>Cl<sub>2</sub>) δ 8.11 – 8.07 (m, 4H),  
151 7.99 – 7.97 (m, 2H), 7.91 – 7.89 (m, 2H), 7.45 – 7.42 (m, 3H), 7.37 – 7.32 (m, 12H), 7.23 – 7.19 (m,  
152 4H), 7.14 – 7.13 (m, 2H), 2.62 (s, 6H), 1.18 (s, 6H). <sup>13</sup>C NMR (126 MHz, CD<sub>2</sub>Cl<sub>2</sub>) δ 147.90, 141.24,  
153 132.98, 129.52, 125.95, 124.61, 123.38, 123.23, 122.22, 121.98, 121.91, 121.67, 121.25, 120.22,  
154 119.87, 109.82, 53.88, 53.66, 53.44, 53.23, 53.01, 30.54, 13.66, 12.54. LC-MS calcd for  
155 C<sub>59</sub>H<sub>41</sub>BF<sub>2</sub>N<sub>4</sub>S<sub>2</sub> [M-H]<sup>+</sup>, 917.2834; found, 917.20.

156

158

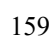

161

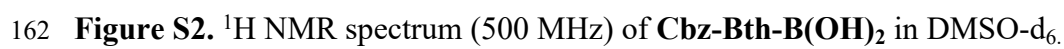







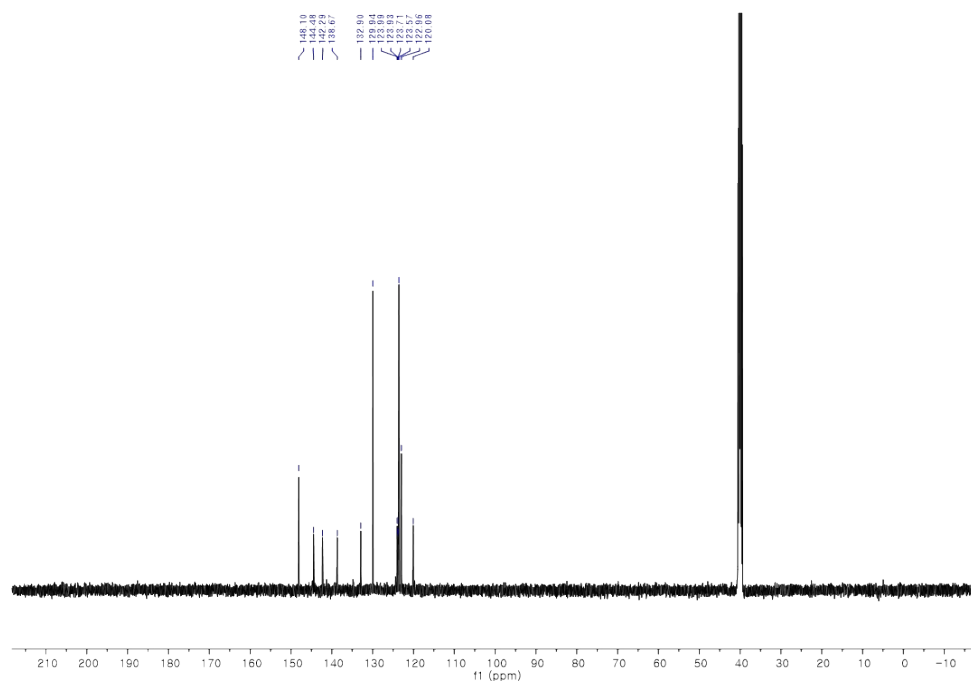

172

173 **Figure S7.**  $^{13}\text{C}$  NMR spectrum (500 MHz) of **Cbz-Bth-B(OH)<sub>2</sub>** in DMSO- $\text{d}_6$ .

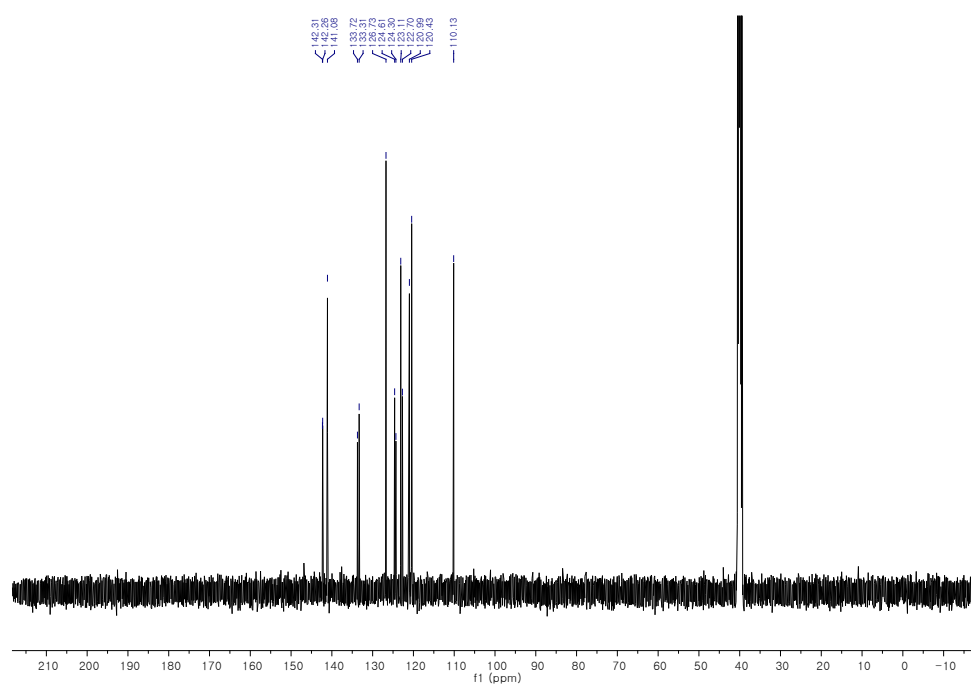

174

175 **Figure S8.**  $^{13}\text{C}$  NMR spectrum (500 MHz) of **Cbz-Bth-BDP** in DMSO- $\text{d}_6$ .

176

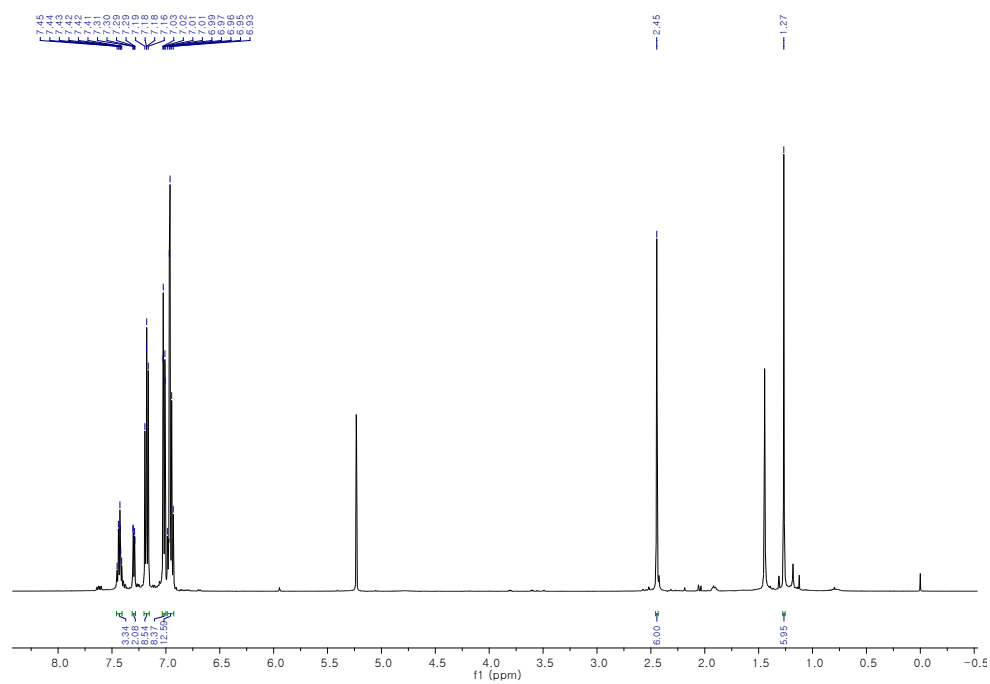

177

178 **Figure S9.** <sup>13</sup>C NMR spectrum (500 MHz) of TPA-BDP in CD<sub>2</sub>Cl<sub>2</sub>.

179

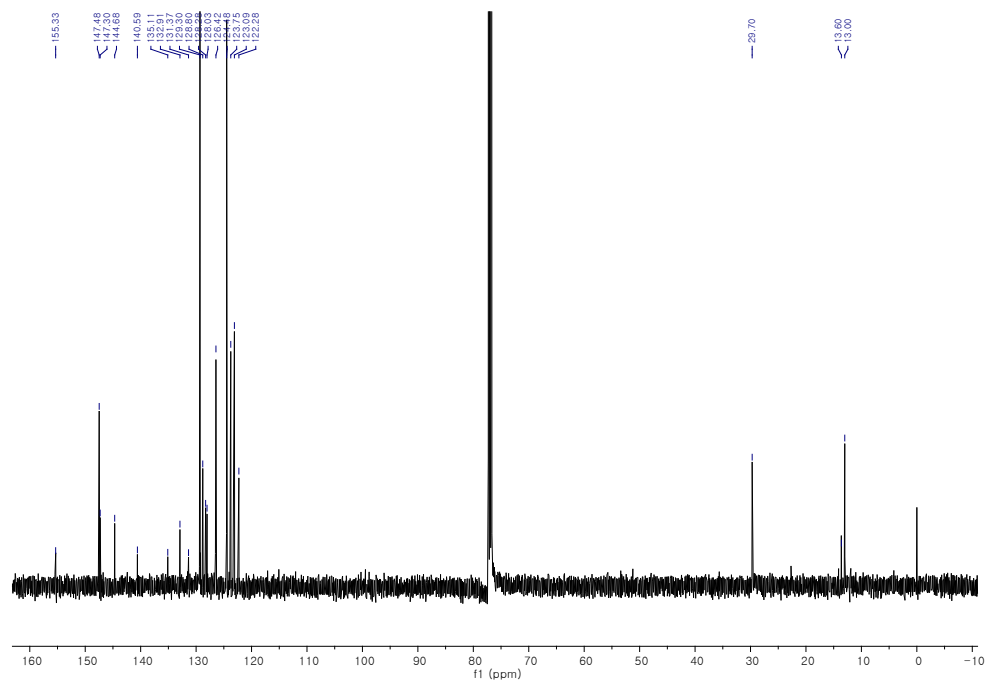

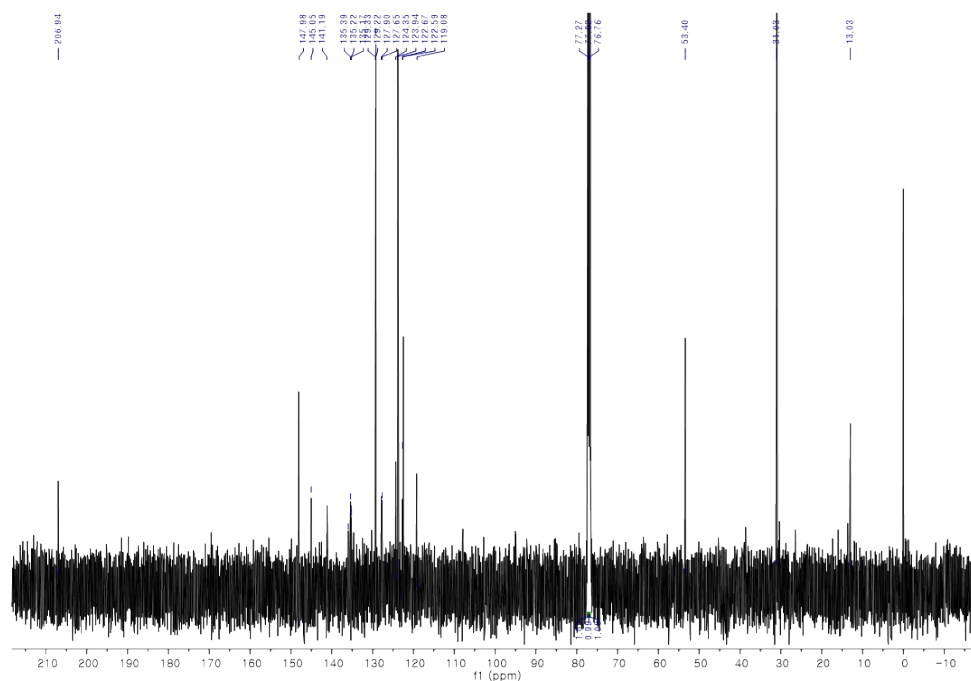

182

183 **Figure S11.**  $^{13}\text{C}$  NMR spectrum (500 MHz) of **DP-Bth-BDP** in  $\text{CD}_2\text{Cl}_2$ .

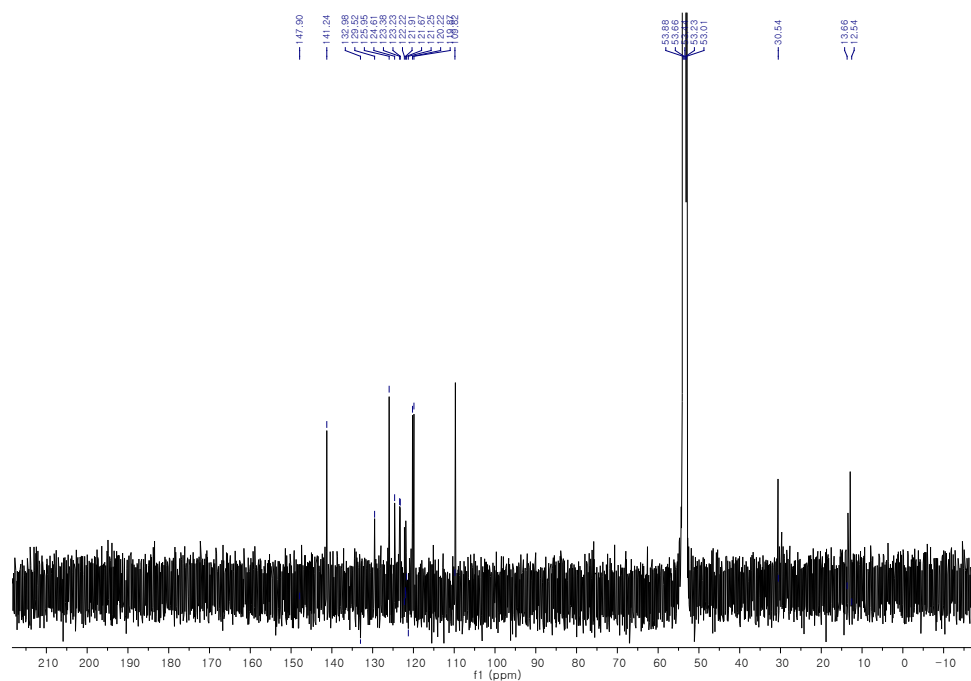

184

185 **Figure S12.**  $^{13}\text{C}$  NMR spectrum (500 MHz) of **Cbz-Bth-BDP** in  $\text{CD}_2\text{Cl}_2$ .

186

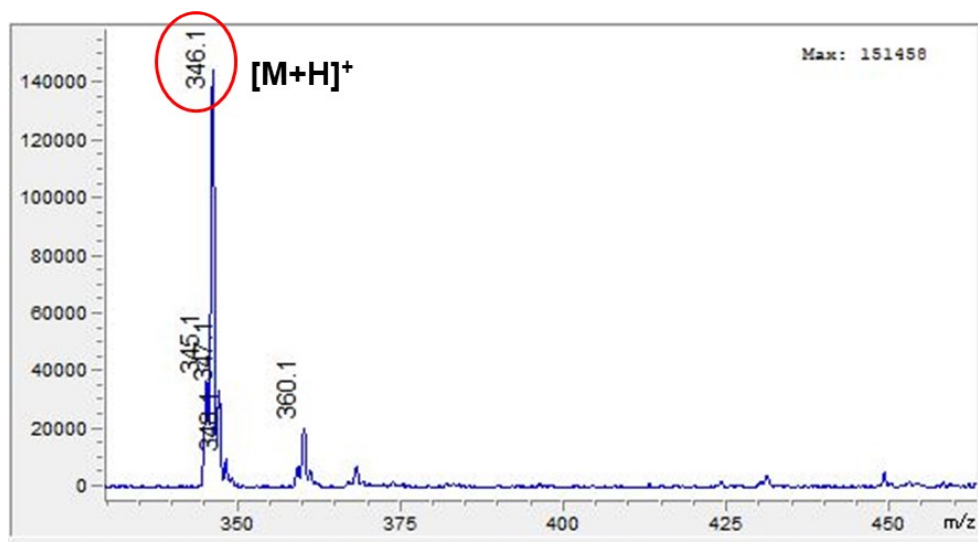

187

188 **Figure S13.** HRMS (ESI) of DP-Bth-B(OH)<sub>2</sub>.

189

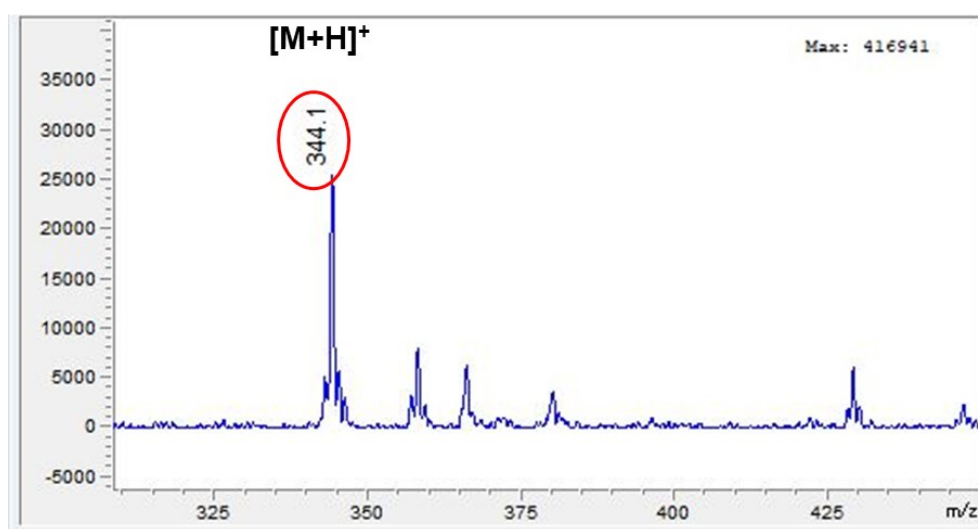

190

191 **Figure S14.** HRMS (ESI) of Cbz-Bth-B(OH)<sub>2</sub>.

192

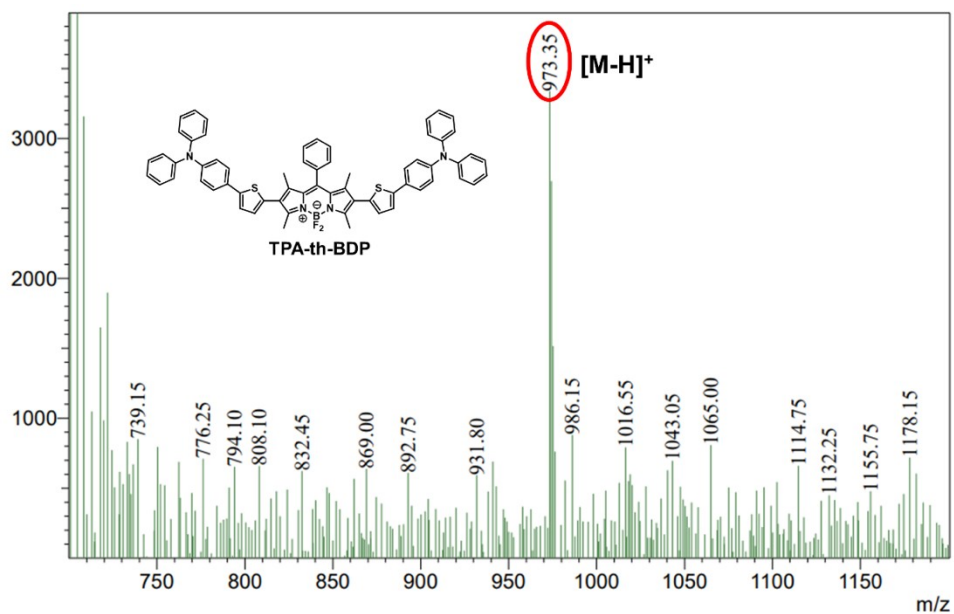

193

194 **Figure S15.** HRMS (ESI) of TPA-th-BDP.

195

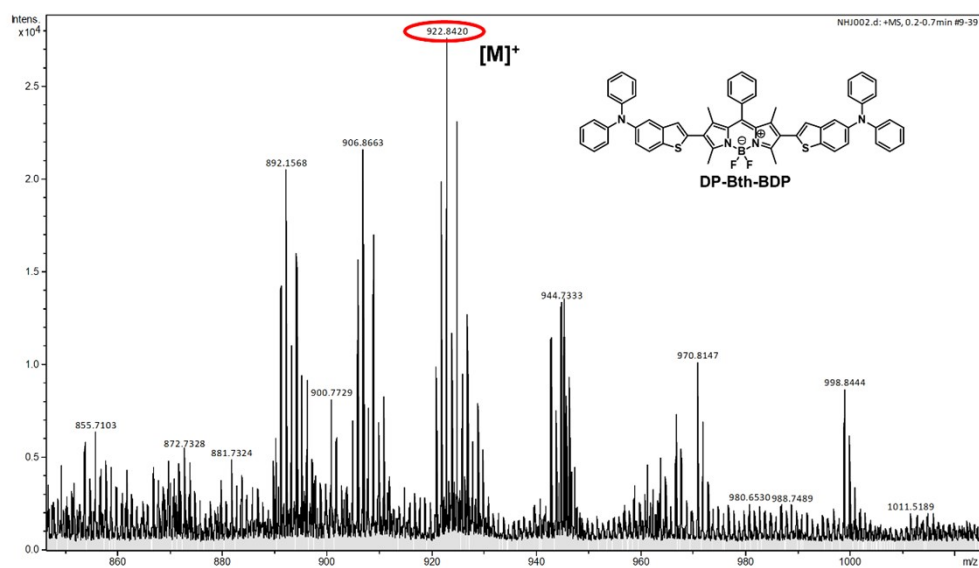

196

197 **Figure S16.** HRMS (ESI) of DP-Bth-BDP.

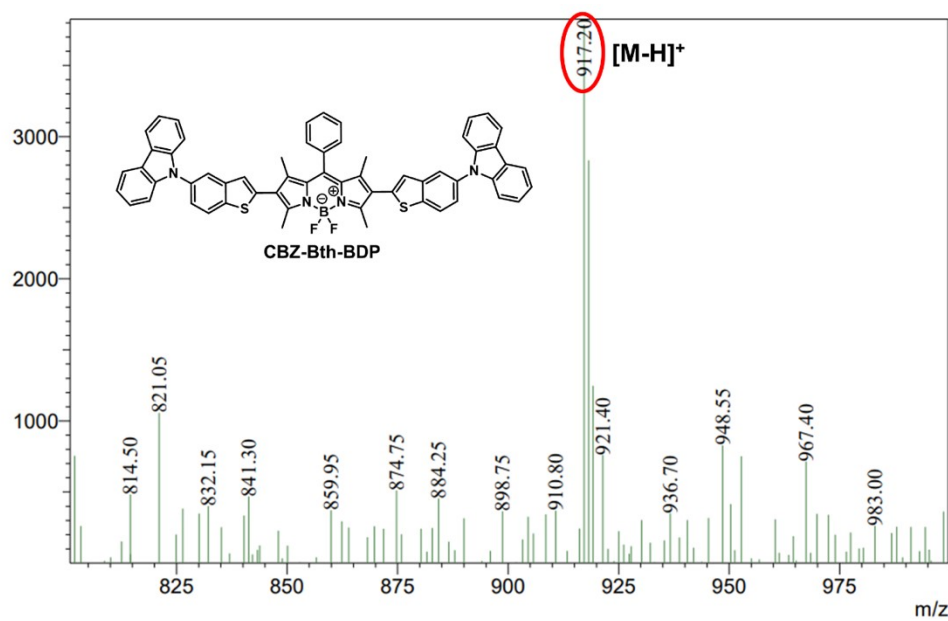

198

199 **Figure S17.** HRMS (ESI) of Cbz-Bth-BDP.

200

201



### 202 3. Additional experimental details and methods

#### 203 Fluorescence Quantum Yield Measurements

204 Rhodamine 6G ( $\Phi_s = 0.93$  in methanol) was used as the reference to determine the relative  
205 fluorescence quantum yields of the synthesized compounds.<sup>[6]</sup>

$$206 \quad \Phi_x = \Phi_s (F_x/F_s) (A_s/A_x) (\lambda_{exs}/\lambda_{exx}) (n_x/n_s)$$

207 where  $\Phi$  represents the quantum yield; F is the integrated area under the corrected emission spectrum;  
208 A stands for the absorbance at the excitation wavelength;  $\lambda_{ex}$  is the excitation wavelength; and the  
209 subscripts x and s refer to the unknown compound and the reference, respectively. The refractive index  
210 of the solvent is denoted by n. Due to the low concentrations of the solutions ( $10^{-6}$ - $10^{-7}$  mol/L), changes  
211 in the refractive index were considered negligible. All values for relative polarity were normalized  
212 from measurements of solvent shifts in absorption spectra, with data extracted from Christian  
213 Reichardt, Solvents and Solvent Effects in Organic Chemistry, Wiley-VCH Publishers, 3rd ed., 2003.

#### 214 ROS detection

##### 215 1) DCFH Assay

216 General ROS generation was measured using 2,7-dichlorodihydrofluorescein (DCFH). Since DCFH  
217 tends to self-oxidize upon prolonged storage, a more stable derivative, DCFH-DA, was acquired  
218 commercially and hydrolyzed to prepare DCFH stock solutions. The protocol was as follows: 0.5 mL  
219 of 1 mM DCFH-DA in ethanol stock solution was mixed with 2 mL of 10 mM NaOH aqueous solution  
220 and stirred in the dark for 30 min to prepare the DCFH stock solution. When DCFH reacts with reactive  
221 oxygen species, green fluorescence ( $\lambda_{em} = 523$  nm) is generated. To compare ROS generation, the  
222 synthesized photosensitizers were irradiated with a 530 nm PDT lamp, and the fluorescence intensity  
223 of DCFH was recorded at 523 nm.

##### 224 2) DHR123 Assay

225 DHR123 (Dihydrorhodamine 123) was used as the superoxide radical indicator in solution tests. This  
226 indicator is converted to Rhodamine 123 in the presence of  $O_2^{\cdot-}$ . Solutions of thiophene-bridged  
227 BODIPY PSs (**Cbz-Bth-BDP**, **DP-Bth-BDP**, and **TPA-th-BDP**) were prepared at a concentration of  
228 5  $\mu$ M, and DHR123 was prepared at a concentration of 10  $\mu$ M in PBS 0.01 M (pH = 7.4) in 10%  
229 DMSO. The cuvettes containing the test substances were exposed to a green PDT Lamp (power  
230 density: 10 mW cm<sup>-2</sup>) for varying durations (0, 10, 20, 30...80, 90, and 100 seconds). The fluorescence  
231 spectra were recorded immediately following each irradiation period.

##### 232 3) HPF Assay

233 HPF (Hydroxylphenyl Fluorescein) was utilized as a chemical sensor specifically for hydroxyl radicals

among type I ROS. HPF is specifically oxidized by  $\text{OH}^\cdot$  and converted to strongly fluorescent fluorescein at 519.5 nm wavelength. The fluorescence intensity of HPF (10  $\mu\text{M}$ ) was measured upon irradiation at 530 nm with a PDT Lamp (light power intensity: 100  $\text{mW cm}^{-2}$ , 10 s interval). Each photosensitizer's concentration was 5  $\mu\text{M}$  in PBS (10 mM, pH 7.4, containing 10% DMF). Since DMSO can scavenge  $\text{OH}^\cdot$ , the HPF stock solution was prepared in DMF solvent. The fluorescence intensity ratio ( $F/F_0$ ) of HPF at 519.5 nm was recorded ( $F_0$ : each compound's fluorescence intensity of HPF without irradiation).

#### 4) ABDA Assay

Singlet oxygen generation by thiophene-bridged BODIPY PSs (**Cbz-Bth-BDP**, **DP-Bth-BDP**, and **TPA-th-BDP**) was tested using 9,10-anthracenedipropionic acid (ABDA) as a singlet oxygen capture agent. In brief, the absorbance of ABDA at 378 nm was adjusted to approximately 1.0 in aqueous solution. Samples of BODIPY PSs (**Cbz-Bth-BDP**, **DP-Bth-BDP**, and **TPA-th-BDP**), each at a concentration of 5  $\mu\text{M}$ , were added to separate cuvettes. These cuvettes were then irradiated with a 530 nm PDT lamp (power density: 100  $\text{mW cm}^{-2}$ ) for various durations (0, 20, 40, 60...140, 160, and 180 seconds). The absorption spectra were recorded immediately after each irradiation period.

#### 5) Singlet oxygen Quantum Yield

Calculations of relative singlet oxygen quantum yields were conducted based on previous literature.  $\text{I}_2$ -BDP ( $\Phi_\Delta = 0.85$  in toluene) served as the standard for determining the relative singlet oxygen quantum yields of synthesized compounds.

A solution of 1,3-Diphenylisobenzofuran (DPBF, singlet oxygen trap) and the synthesized photosensitizers was added to a cuvette filled with air-saturated toluene. The solutions were kept in the dark until the absorbance readings stabilized, followed by continuous light irradiation. The absorption of DPBF at 414 nm was monitored every 3 seconds to obtain the decay rate of the photosensitizing processes. Measurements were performed using a green LED light source (10  $\text{mW cm}^{-2}$ ).

The  $^1\text{O}_2$  quantum yields of the synthesized compounds were calculated using the equation.

$$\phi_\Delta(\text{PS}) = \phi_\Delta(\text{ref}) \times \frac{m(\text{PS})}{m(\text{ref})} \times \frac{F(\text{ref})}{F(\text{PS})} \times \frac{m(\text{PS})}{m(\text{ref})}$$

where PS and ref represent the photosensitizer and the reference ( $\text{I}_2$ -BDP), respectively.  $m$  denotes the slope of the change in absorbance of DPBF at its absorbance maxima over irradiation time.  $F$  is defined as  $F = 1 - 10^{-\text{OD}}$ , where OD represents the optical density at the excitation wavelength. PF represents absorbed photonic flux ( $\mu\text{Einstein dm}^{-3}\text{s}^{-1}$ ).

#### Electro Paramagnetic Resonance (EPR) Analysis

266 EPR spectrum was detected using 5,5-dimethyl-1-pyrroline *N*-oxide (DMPO) as a superoxide radical  
267 spin trapping agent, 5-tert-Butoxycarbonyl-5-methyl-1-pyrroline-*N*-oxide (BMPO) as a hydroxyl  
268 radical spin trapping agent, and 2,2,6,6-tetramethylpiperidine (TEMP) as a singlet oxygen spin  
269 trapping agent. The samples were prepared in 4 mL vials. All tests were conducted at 293 K with the  
270 following settings: Frequency = 9432.830 MHz; MOD Frequency = 100.00 kHz; Power = 3.0 mW.

271 1) Superoxide radical spin trapping experiment. Solutions of BODIPY PSs (TPA-BDP, **TPA-th-BDP**,  
272 **DP-Bth-BDP**, and **Cbz-Bth-BDP**) were prepared at a concentration of 200  $\mu\text{M}$  in DMF. TEMP (50  
273  $\mu\text{L mL}^{-1}$ ) was added to each solution in a 4 mL vial. The samples were irradiated using a 530 nm PDT  
274 lamp (power density: 100  $\text{mW cm}^{-2}$ ) for 3 min. EPR signals were measured immediately after  
275 photoradiation.

276 2) For hydroxyl radical detection, BODIPY PSs (TPA-BDP, **TPA-th-BDP**, **DP-Bth-BDP**, and **Cbz-**  
277 **Bth-BDP**) were prepared at a concentration of 200  $\mu\text{M}$  in THF. BMPO (50  $\mu\text{L mL}^{-1}$ ) was added to  
278 each solution in a 4 mL vial, followed by irradiation with a 530 nm PDT lamp (power density: 100  
279  $\text{mW cm}^{-2}$ ) for 3 min. BMPO,  $\text{FeCl}_2$ , and  $\text{H}_2\text{O}_2$  stocks were all prepared in deionized water (DW). PSs  
280 were prepared in THF. Standard Fenton reaction conditions were set up using  $\text{FeCl}_2$  (1 mM, 1 eq) and  
281  $\text{H}_2\text{O}_2$  (10 mM, 1 eq) to validate hydroxyl radical generation.

282 3) For singlet oxygen detection, solutions of BODIPY PSs (TPA-BDP, **TPA-th-BDP**, **DP-Bth-BDP**,  
283 and **Cbz-Bth-BDP**) (200  $\mu\text{M}$  in DMF), were prepared with the addition of DMPO (50  $\mu\text{L mL}^{-1}$ ) in 4  
284 mL vials. The samples were exposed to a 530 nm PDT lamp (power density: 100  $\text{mW cm}^{-2}$ ) for 3 min.

## 285 Cyclic Voltammogram

286 Cyclic voltammetry was used to examine the electrochemical properties of the synthesized heavy-  
287 atom-free BODIPY PSs. Measurements were performed using a potentiostat (eDAQ, EA161) at a scan  
288 rate of 100  $\text{mV s}^{-1}$ . Cyclic voltammetry data was obtained using ferrocene as a reference to measure  
289 the oxidation and reduction potentials of the synthesized heavy-atom-free BODIPY PSs (TPA-BDP,  
290 **TPA-th-BDP**, **DP-Bth-BDP**, and **Cbz-Bth-BDP**). Ferrocene was used as a reference in anhydrous  
291 dichloromethane with tetrabutylammonium hexafluorophosphate (0.1 M). The working electrode was  
292 prepared by drop-casting the sample onto a platinum (Pt) plate, while a Pt/Ti wire anode served as the  
293 counter electrode. A 3M NaCl solution was used as the reference electrode. Tetrabutylammonium  
294 hexafluorophosphate ( $\text{NBu}_4\text{PF}_6$ , 0.10 M) in distilled dichloromethane was used as the electrolyte  
295 solution. The energy gap between the highest occupied molecular orbital (HOMO) and lowest  
296 unoccupied molecular orbital (LUMO) levels was determined by measuring the onset oxidation  
297 potentials ( $E_{\text{OX onset}}$ ). The LUMO and HOMO energy levels were determined using the following  
298 equations:

$$299 \quad \text{LUMO} = - (4.8 + E_{\text{Red}} - E_{\text{FC}}) \quad (E_{\text{FC}}: \text{ferrocene's } E_{\text{OX}}^{\text{onset}})$$

$$300 \quad \text{HOMO} = - (4.8 + E_{\text{ox}} - E_{\text{FC}})$$

UV optical band (band gap) = LUMO – HOMO

## Computational Method

Quantum calculations for this study were performed using Gaussian 16. The Avogadro software was used to visualize molecular orbitals.<sup>[7]</sup> All calculations were performed at the M062X/def2-SVP level of theory with the SMD solvation model in a polar environment (water),<sup>[8]</sup> unless mentioned otherwise. The corrected linear solvation formalism was used to obtain the electronic energy of various excited states.

Given the limitations of the M062X functional in accurately describing the  $S_1$ (ET) state, the B3LYP/def2-SVP level of theory was utilized for the geometry optimization of the  $S_1$ (ET) state under the linear solvation formalism. To ensure complete charge separation during these calculations, two dihedral angles of the 6-position substituents were constrained to 90°. Following geometry optimization, the M062X/def2-SVP level of theory with the corrected linear solvation formalism was applied to calculate the electronic energy of the  $S_1$ (ET) state.

The  $\Delta E_{ST}$  values were calculated based on the difference between the  $S_1$  and  $T_n$  ( $n=1,2$ ) energy levels. Spin-orbit coupling (SOC) values were calculated using ORCA 5.0 [9] based on the optimized  $S_1$ (ET) molecular structure, employing the M06-2X/def2-SVP level of theory alongside the linear solvation formalism.

The ionization potential (IP) and electron affinity (EA) of various substituents were calculated by first optimizing the geometries of the neutral molecules, followed by the corresponding radicals (cations for IP and anions for EA). The IP and EA values were then determined based on the Gibbs energy difference between the optimized radical and neutral species.

The electron affinity (EA) of the photosensitizers in the triplet state ( $T_1$ ) was calculated through a multi-step process. First, the triplet state geometries were optimized using time-dependent density functional theory (TD-DFT). Subsequently, energy correction was applied using the corrected linear solvation formalism. Next, the corresponding anion was optimized. Finally, the EA values were determined based on the electronic energy difference between the optimized radical and neutral  $T_1$  species.

## Bio studies

### 1) Cell Culture

Human breast cancer cell lines MDA-MB-231, T47D, and MCF-7 were maintained in Roswell Park Memorial Institute (RPMI) 1640 medium (GIBCO), supplemented with 10% fetal bovine serum (HyClone), 100 U mL<sup>-1</sup> penicillin, and 100 µg mL<sup>-1</sup> streptomycin (HyClone). The cells were cultured in a humidified incubator (5% CO<sub>2</sub> at 37°C).

## 334 2) Cell Viability Assay

335 The cytotoxic effects of BODIPY PSs (TPA-BDP, **TPA-th-BDP**, **DP-Bth-BDP**, and **Cbz-Bth-BDP**)  
336 on MDA-MB-231 cells were determined using an Thiazolyl Blue tetrazolium bromide, 98% (MTT)-  
337 based cell viability assay kit. Briefly, ca.  $8 \times 10^3$  MDA-MB-231 cells per well were seeded in a 96-  
338 well plate for 24 h at 37 °C in a humidified, 5% CO<sub>2</sub> atmosphere. The cells were then treated with  
339 different concentrations of Cbz-Bth-BDP (0, 0.5, 1, 2, 4, and 8  $\mu$ M) to determine the IC<sub>50</sub> value. 24 h  
340 later, the cells were subjected to photoirradiation (530 nm PDT Lamp, 10 min, 100 mW cm<sup>-2</sup>).  
341 Following another day of incubation, 10  $\mu$ L of MTT (5 mg mL<sup>-1</sup>) was added to each well, and the cells  
342 were incubated for an additional 2–4 h. The medium was suctioned, and 150  $\mu$ L of DMSO was added  
343 to dissolve the formazan crystals. Cell viability was determined using a multiplate reader (HOIL  
344 BIOMED Co.) by recording the absorbance at 570 nm. Cell viability was calculated using the  
345 following equation:

346 
$$\text{Cell viability (\%)} = (\text{OD}_{ps} - \text{OD}_{\text{blank control}}) / (\text{OD}_{\text{control}} - \text{OD}_{\text{blank control}}) \times 100\%$$

## 347 3) Intracellular NADH Detection

348 The effect of BODIPY PSs (TPA-BDP, **TPA-th-BDP**, **DP-Bth-BDP**, and **Cbz-Bth-BDP**) on  
349 intracellular NADH levels was evaluated using the NAD<sup>+</sup>/NADH-Glo™ Assay (bioluminescent) kit.  
350 In brief, MDA-MB-231 cells were seeded in a 96-well plate at a density of  $1 \times 10^4$  per well and cultured  
351 in a cell incubator at 37 °C. The cells were treated with the indicated drugs for 24 h, then the initial  
352 medium was discarded and replaced with 50  $\mu$ L PBS. Following 530 nm photoirradiation for 10 min  
353 at a density of 100 mW cm<sup>-2</sup>, the luminescence of the samples was measured according to the  
354 instructions of the manufacturer. The NAD<sup>+</sup>/NADH ratios were calculated by dividing the  
355 luminescence of the NAD<sup>+</sup> samples by the luminescence of the NADH samples:

356 
$$\text{Ratio of NAD}^+/\text{NADH} = ((\text{Luminescence of NAD samples})) / (\text{luminescence of NADH samples})$$

## 357 4) Western blot analysis

358 The expression of pyroptosis-associated proteins, including cleaved-caspase3, caspase3, and GSDME,  
359 was evaluated using western blot. After the treatment with BODIPY PSs (TPA-BDP, **TPA-th-BDP**,  
360 **DP-Bth-BDP**, and **Cbz-Bth-BDP**), the samples were harvested and washed with cold PBS. Cell  
361 lysates were prepared by incubating the cells in ice-cold radioimmunoprecipitation assay buffer,  
362 followed by sonication and centrifugation (20,000 g, 10 min). Protein concentrations were determined  
363 using a bicinchoninic acid (BCA) assay. 30-50 micrograms of total protein samples were separated by  
364 SDS-PAGE and transferred onto PVDF membranes. The membranes were blocked with 5% w/v skim  
365 milk and incubated overnight at 4 °C with primary antibody: GSDME (Abcam, catalog no. ab215191),  
366 cleaved-caspase3 antibody (Cell Signaling Technology, catalog no. 9661s), IL-1 $\beta$  (GeneTex, catalog  
367 no. GTX74034) and  $\beta$ -actin (Santa Cruz Biotechnology, catalog no. sc-47778) at a 1:1,000 dilution.

368 After washing with PBST, the membranes were incubated for 2 h with the relevant secondary antibody  
369 at a 1:1,000 dilution: anti-mouse (GeneTex, catalog no. GTX213110-01); anti-rabbit (Santa Cruz  
370 Biotechnology, catalog no. sc-2357). The protein expression levels were detected using enhanced  
371 chemiluminescence reagents (Luminate, Merck Millipore) and imaged using a Syngene Bio Imager  
372 (Synoptics Ltd., Cambridge, UK).

### 373 **5) LDH Release Measurement**

374 The release of LDH (lactose dehydrogenase) was measured using the CytoTox96™ Non-Radioactive  
375 Cytotoxicity Assay Kit (Promega, USA). For the positive control, maximum LDH release was induced  
376 by treating cells with a lysis buffer, followed by incubation at 37°C and 5% CO<sub>2</sub> for 45 min. The  
377 substrate solution, stored at -20°C, was warmed to room temperature before use. The substrate was  
378 added to the medium of each group and incubated in the dark for 30 min. A stop solution was then  
379 added to each well. The proportion of LDH released was calculated using the following formula: LDH  
380 Release (%) = (LDH treated average value - LDH untreated cells average value) / (LDH total lysis  
381 average value - LDH untreated cells average value) × 100. Absorbance was measured at 490 nm using  
382 a multi-plate reader (HOIL BIOMED Co.)

### 383 **6) ATP Release Measurement**

384 ATP release into the cell medium was determined to evaluate cell membrane damage. Cells were  
385 treated with the indicated drugs for 24 h, the medium was replaced with fresh medium, and the cells  
386 were exposed to photoirradiation (530 nm, 100 mW cm<sup>-2</sup>, 10 min). After a further 6 h of incubation,  
387 the medium was collected and the ATP concentration was measured using a multi-plate reader.

### 388 **7) 3D tumor spheroid inhibition**

389 For 3D multicellular spheroids (MCSs), approximately 2 × 10<sup>3</sup> T47D cells per well were seeded in 96-  
390 well plates (U-shaped) (Sumitomo Bakelite, Japan). After 3 days of incubation, the T47D MCSs were  
391 treated with thiophene-bridged BODIPY PSs (**TPA-th-BDP**, **DP-Bth-BDP**, and **Cbz-Bth-BDP**) for  
392 48 h and exposed to photoirradiation (530 nm, 100 mW cm<sup>-2</sup>, 20 min). After culturing for another 48  
393 h, the viability of the spheroid was determined using the CellTiter-Glo™ 3D Cell Viability Assay  
394 (Promega, Germany). The luminescence of ATP was detected through a multi-plate reader.

### 395 **8) Live/Dead tumor spheroid Imaging**

396 The anticancer effects of BODIPY PSs (**TPA-BDP**, **TPA-th-BDP**, **DP-Bth-BDP**, and **Cbz-Bth-BDP**)  
397 on tumor spheroids were determined using Calcein-AM/propidium iodide (PI) co-stain assay. In brief,  
398 after treatment with the indicated drugs, the spheroid samples were stained with Calcein-AM and PI  
399 in a cell incubator for 30 min. Following the washing with PBS, the stained spheroids were imaged  
400 using an Olympus FV3000 confocal laser scanning microscope.

401

## 402 9) Cell Morphology Imaging

403 Cellular photon-induced pyroptosis was detected by FITC-Annexin V/Hoechst 33342 staining.  
404 MDA-MB-231 cells were seeded in a 35 mm glass-bottom confocal dish and incubated for 24 h. The  
405 cells were treated with 2  $\mu$ M of each BODIPY PSs (TPA-BDP, **TPA-th-BDP**, **DP-Bth-BDP**, and  
406 **Cbz-Bth-BDP**) and incubated for another 24 h. Morphological changes were visualized using  
407 fluorescence microscopy with excitation wavelengths of 405 nm and 640 nm. Emission was collected  
408 from 410 to 470 nm (blue channel) and 650 to 750 nm (red channel). For the Annexin V/Hoechst  
409 33342 staining, 10X binding buffer was diluted into 1X binding buffer using distilled water. The  
410 working solution of 1  $\mu$ g mL<sup>-1</sup> of Hoechst 33342 was then prepared in 1X binding buffer. Cells were  
411 stained with a mixture of Hoechst 33342 and FITC-Annexin V after washing with binding buffer.  
412 Confocal images were captured using excitation of 405 and 488 nm, with emission signals collected  
413 at 430 to 470 nm (blue channel) and 500 to 540 nm (green channel).

## 414 10) Calcein/AM staining

415 To evaluate the effects of heavy-atom-free BODIPY PSs (TPA-BDP, **TPA-th-BDP**, **DP-Bth-BDP**,  
416 and **Cbz-Bth-BDP**) on MDA-MB-231 cells, ca.  $3 \times 10^4$  MDA-MB-231 cells were seeded in glass  
417 bottom confocal dishes and cultured overnight. The cells were then incubated with 2  $\mu$ M concentration  
418 of each BODIPY PSs (TPA-BDP, **TPA-th-BDP**, **DP-Bth-BDP**, and **Cbz-Bth-BDP**) for another 24  
419 h. After exposure to 530 nm light (100 mW cm<sup>-2</sup>) for 10 min, photo-irradiated cells were incubated for  
420 24 h in the incubator (37 °C, 5% CO<sub>2</sub>). They were then stained with 2  $\mu$ M Calcein AM (Calcein  
421 acetoxymethyl ester, live cell marker,  $\lambda_{ex}$  = 473 nm and  $\lambda_{em}$  = 490-590 nm) and 4  $\mu$ M PI (propidium  
422 iodide, dead cell marker,  $\lambda_{ex}$  = 559 nm and  $\lambda_{em}$  = 575-675 nm) for 30 min. After rinsing with PBS,  
423 cell imaging was carried out using an Olympus FV3000 confocal laser scanning microscope.

## 424 11) Statistical analyses

425 Data were analyzed by one-way analysis of variance using SPSS (version 21.0; IBM Corp., Armonk,  
426 NY, USA). Tukey's post hoc test was used to determine the significance of all pairwise comparisons  
427 of interest. Statistical significance was defined as \* $P$  < 0.05.

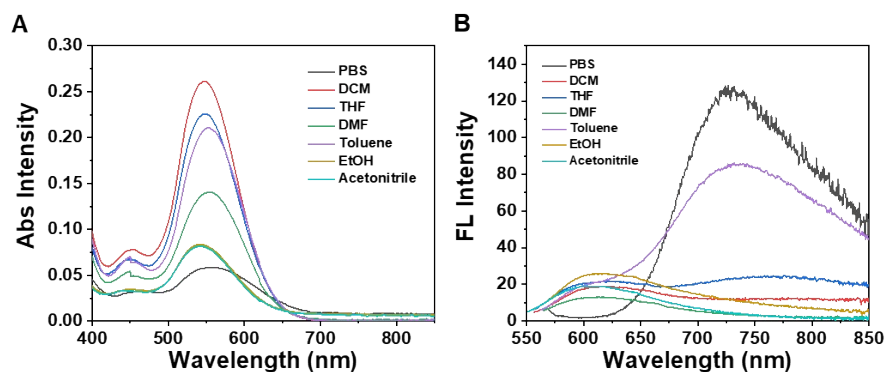

428

429 **Figure S18.** Photophysical properties of **TPA-th-BDP**. (A) Absorbance spectra and (B) Fluorescence  
 430 spectra of **TPA-th-BDP** in different organic solvents (PBS, DCM, THF, DMF, Toluene, EtOH, and  
 431 Acetonitrile). The concentration of **TPA-th-BDP** was maintained at 5  $\mu$ M. Fluorescence spectra were  
 432 obtained upon excitation at the maximum excitation wavelength for each solvent.

433

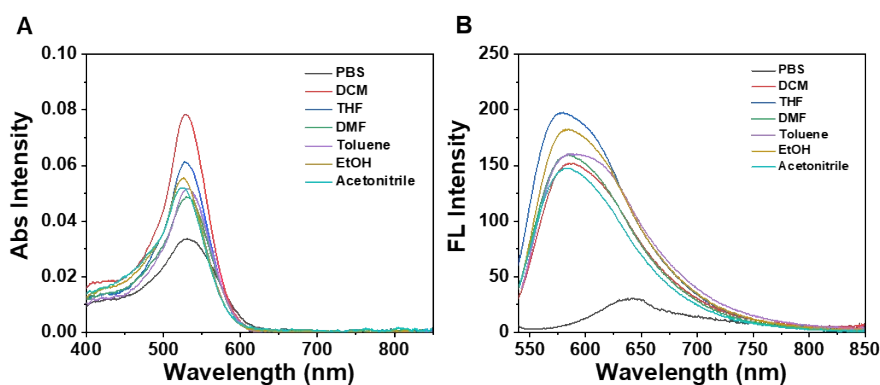

434

435 **Figure S19.** Photophysical properties of **DP-Bth-BDP**. (A) Absorbance spectra and (B) Fluorescence  
 436 spectra of **DP-Bth-BDP** in different organic solvents (PBS, DCM, THF, DMF, Toluene, EtOH, and  
 437 Acetonitrile). The concentration of **DP-Bth-BDP** was maintained at 5  $\mu$ M. Fluorescence spectra were  
 438 obtained upon excitation at the maximum excitation wavelength for each solvent.

439



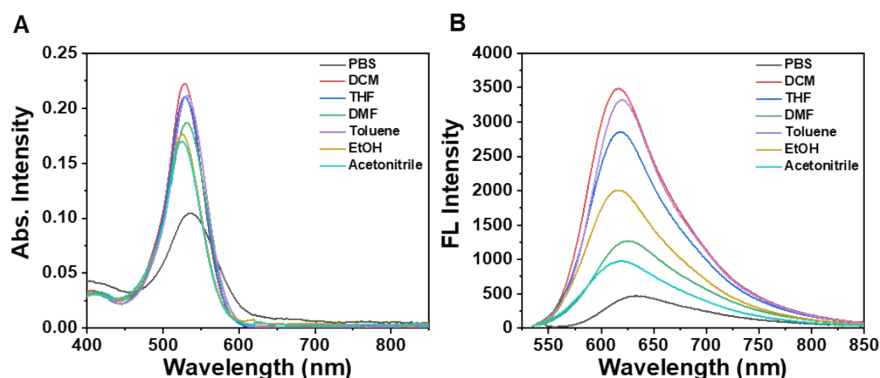

440

441 **Figure S20.** Photophysical properties of **Cbz-Bth-BDP**. (A) Absorbance spectra and (B) Fluorescence  
 442 spectra of **Cbz-Bth-BDP** in different organic solvents (PBS, DCM, THF, DMF, Toluene, EtOH, and  
 443 Acetonitrile). The concentration of **Cbz-Bth-BDP** was maintained at 5  $\mu\text{M}$ . Fluorescence spectra were  
 444 obtained upon excitation at the maximum excitation wavelength for each solvent.

445

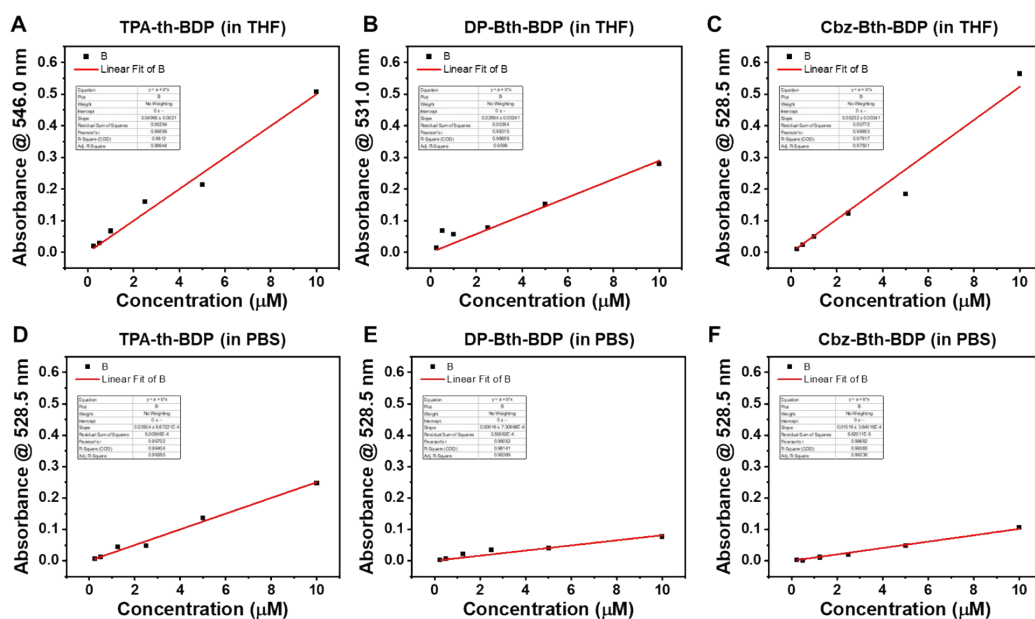

446

447 **Figure S21.** Determination of molar extinction coefficient ( $\epsilon$ ) for BODIPY PSs (**TPA-th-BDP**, **DP-**  
 448 **Bth-BDP**, and **Cbz-Bth-BDP**) in THF (A-C) and PBS (D-F). UV-Vis absorption spectra of BODIPY  
 449 derivatives were measured in THF and PBS at room temperature (25°C). The spectra were recorded at  
 450 various concentrations ranging from 0.25 to 10  $\mu\text{M}$ . Calibration curve of absorbance at the  $\lambda_{\text{max}}$  (nm)  
 451 against the concentration of the compounds. The molar extinction coefficient ( $\epsilon$ ) was calculated from  
 452 the slope of the linear regression, expressed as  $\epsilon$  ( $\text{L} \cdot \text{mol}^{-1} \cdot \text{cm}^{-1}$ ).

453

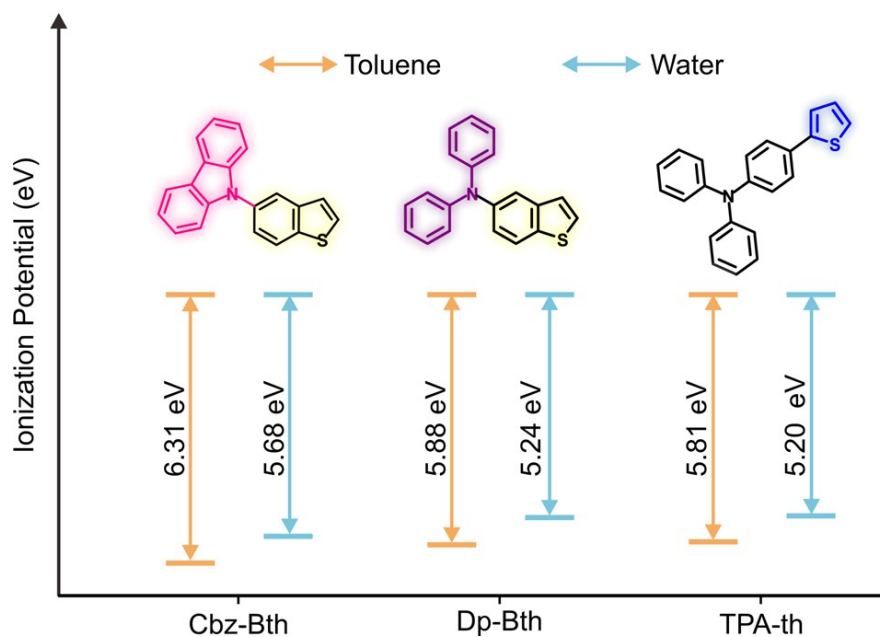

454

455 **Figure S22.** Ionization potential (IP) of various substituents in water and toluene. A lower IP value  
 456 indicates a stronger electron-donating ability.

457

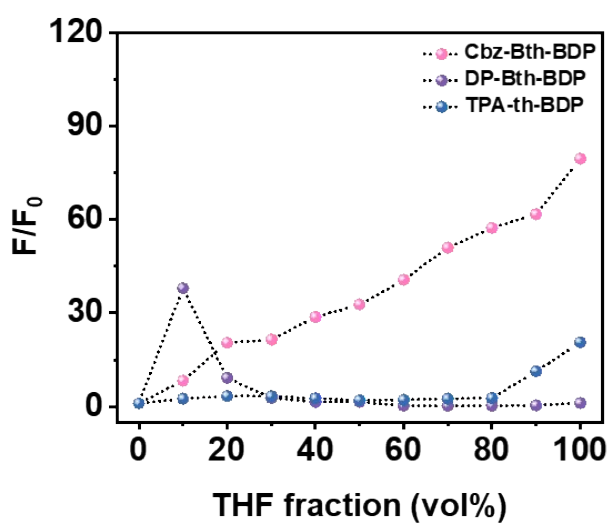

458

459 **Figure S23.** Fluorescence intensity of thiophene-bridged BODIPY PSs (TPA-th-BDP, DP-Bth-BDP,  
 460 and Cbz-Bth-BDP). The fluorescence intensity ratio ( $F/F_0$ ) was measured in different fractions of THF  
 461 and H<sub>2</sub>O.  $F$  and  $F_0$  are the fluorescence intensities of BODIPY PCs in the absence and presence of  
 462 THF, respectively).

463

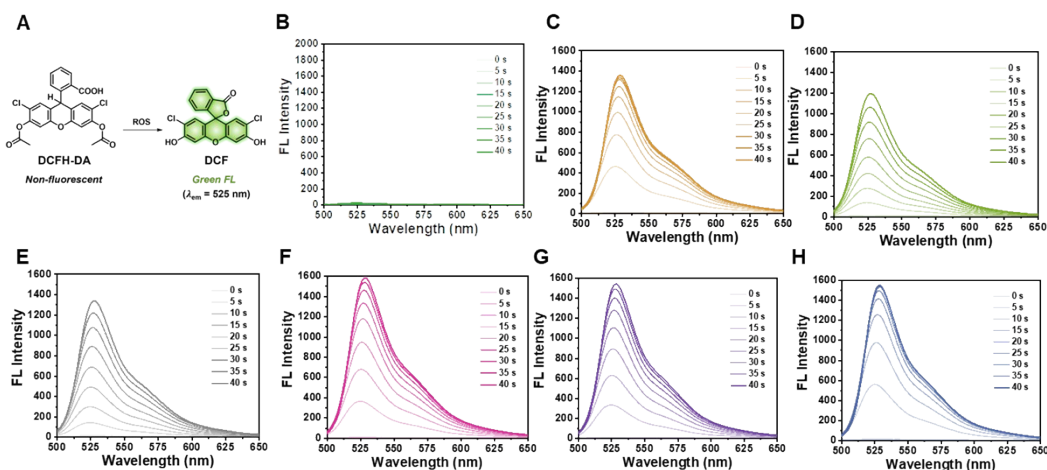

464

465 **Figure S24.** (A) DCFH assays for ROS generation. The fluorescence intensity of DCFH (10  $\mu\text{M}$ ) was  
 466 monitored at 523 nm upon irradiation with a 530 nm PDT Lamp (light intensity of 10  $\text{mW cm}^{-2}$ ) at 5  
 467 s intervals. Each photosensitizer was prepared at a concentration of 5  $\mu\text{M}$  in PBS solution (10 mM, pH  
 468 7.4, containing 10% DMSO). The fluorescence intensity ratio ( $F/F_0$ ) of DCFH at 525 nm was recorded  
 469 ( $F_0$ : each compound's fluorescence intensity of DCFH at 0 s). Fluorescence spectra are shown for (B)  
 470 DCFH only, (C) BDP-I<sub>2</sub>, (D) BDP-Br<sub>2</sub>, (E) **Cbz-Bth-BDP**, (F) **DP-Bth-BDP**, and (G) **TPA-th-BDP**.

471

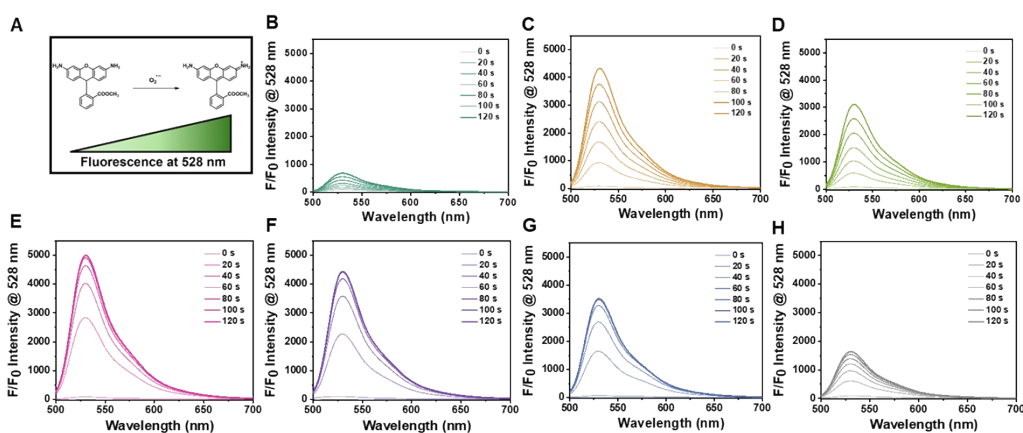

472

473 **Figure S25.** (A) DHR123 assays for superoxide radicals ( $\text{O}_2^{\bullet-}$ ) generation. The fluorescence intensity  
 474 of DHR123 (10  $\mu\text{M}$ ) was measured at 528 nm upon irradiation with a 530 nm PDT Lamp (100  $\text{mW}$   
 475  $\text{cm}^{-2}$ ) at 20 s intervals. Each photosensitizer (5  $\mu\text{M}$ ) was prepared in PBS solution (10 mM, pH 7.4)  
 476 containing 10% DMSO. The fluorescence intensity ratio ( $F/F_0$ ) of DHR123 at 528 nm was recorded  
 477 ( $F_0$ : each compound's fluorescence intensity of DHR123 at 0 s). Fluorescence spectra are shown for  
 478 (B) DHR123 only, (C) BDP-I<sub>2</sub>, (D) BDP-Br<sub>2</sub>, (E) **Cbz-Bth-BDP**, (F) **DP-Bth-BDP**, (G) **TPA-th-**  
 479 **BDP**, and (H) **TPA-BDP**.

480

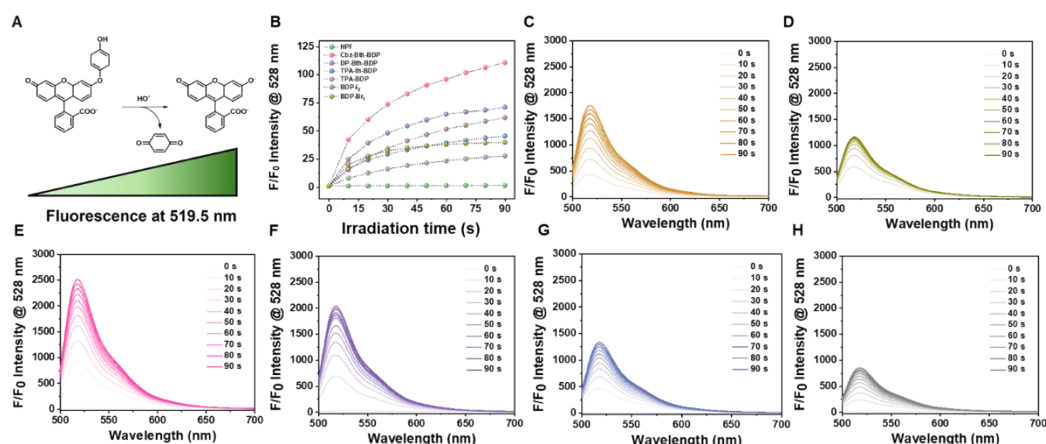

481

482 **Figure S26.** (A) HPF assays for hydroxyl radicals ( $\bullet\text{OH}$ ) generation. The fluorescence intensity of  
 483 HPF ( $10\ \mu\text{M}$ ) was measured at 528 nm upon irradiation with a 530 nm PDT Lamp ( $100\ \text{mW cm}^{-2}$ ) at  
 484 10 s intervals. Each photosensitizer ( $5\ \mu\text{M}$ ) was prepared in PBS buffer (10 mM, pH 7.4) containing  
 485 10% DMSO. The fluorescence intensity ratio ( $F/F_0$ ) of HPF at 528 nm was recorded ( $F_0$ : each  
 486 compound's fluorescence intensity of HPF at 0 s). Fluorescence spectra are shown for (B) Comparison  
 487 of singlet oxygen generation by BODIPY-based photosensitizers, (C) BDP- $\text{I}_2$ , (D) BDP- $\text{Br}_2$ , (E) **Cbz-**  
 488 **Bth-BDP**, (F) **DP-Bth-BDP**, (G) **TPA-th-BDP**, and (H) TPA-BDP.

489

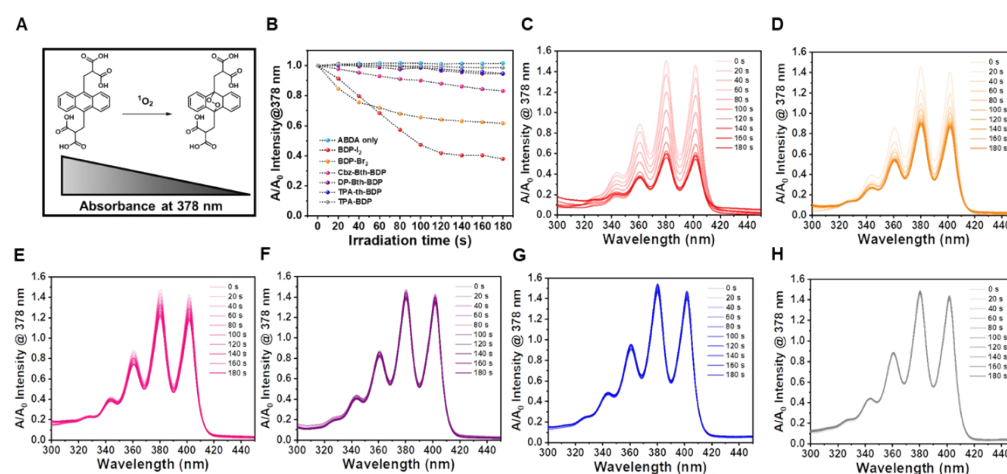

490

491 **Figure S27.** ABDA assay for singlet oxygen ( $^1\text{O}_2$ ) generation. The fluorescence intensity of DHR123  
 492 ( $10\ \mu\text{M}$ ) was measured at 528 nm upon irradiation with a 530 nm PDT Lamp ( $100\ \text{mW cm}^{-2}$ ) at 10 s  
 493 intervals. Each photosensitizer ( $5\ \mu\text{M}$ ) was prepared in PBS buffer (10 mM, pH 7.4) containing 10%  
 494 DMSO. (A) The absorbance ratio ( $A/A_0$ ) of ABDA at 378 nm was recorded ( $A_0$ : each compound's  
 495 absorbance of ABDA at 0 s). Absorbance spectra are shown for (B) Comparison of singlet oxygen  
 496 generation by BODIPY PCs, (C) BDP- $\text{I}_2$ , (D) BDP- $\text{Br}_2$ , (E) **Cbz-Bth-BDP**, (F) **DP-Bth-BDP**, (G)  
 497 **TPA-th-BDP**, and (H) TPA-BDP.

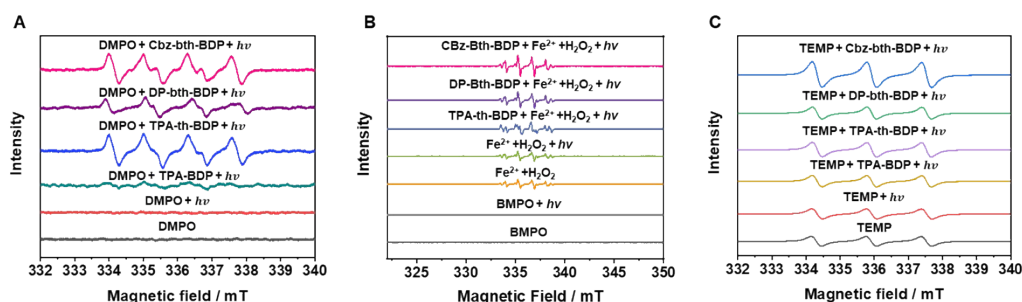

498

499 **Figure S28.** EPR spectra of (A) DMPO (superoxide radical trap,  $50 \mu\text{L mL}^{-1}$ ), (B) BMPO (hydroxyl  
500 radical trap,  $50 \mu\text{L mL}^{-1}$ ), and (C) TEMP (singlet oxygen trap,  $50 \mu\text{L mL}^{-1}$ ) were used to assess ROS  
501 generation by photo-irradiated thiophene-bridged BODIPY-based photosensitizers. Experiments were  
502 performed in DMF, ACN, and DW solutions, respectively. Conditions: 530 nm green light; power  
503 density:  $100 \text{ mW cm}^{-2}$ ; irradiation time: 3 min. The concentration of radical trapping agents:  $200 \mu\text{M}$ .  
504

505

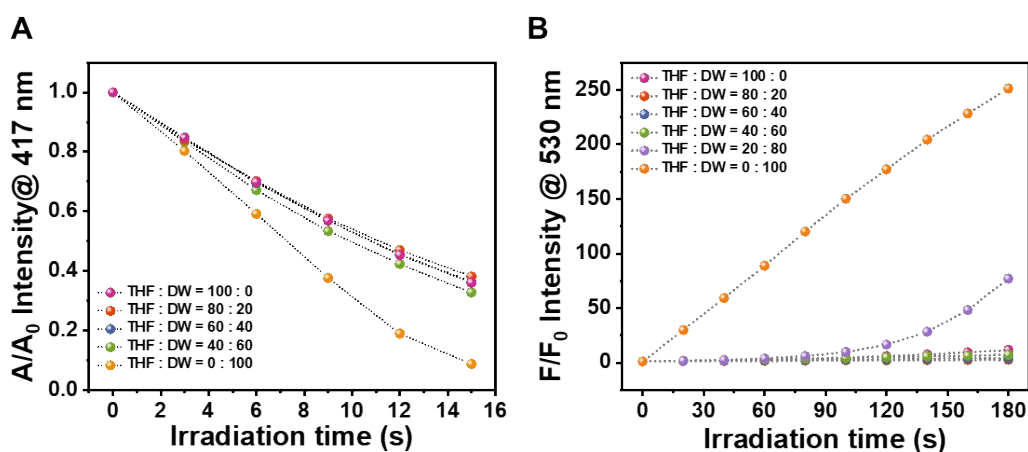

506

507 **Figure S29.** ROS assays in aqueous solutions with varying fractions of THF to investigate the role of  
508 aggregation. (A) Degradation rates of DPBF by photoexcited **CBz-Bth-BDP** in THF/water solvent  
509 systems.  $A_0$  and  $A$  are the absorbance of DPBF at 417 nm before and after irradiation, respectively.  
510 (B) DHR123 assays in THF/water mixture by photoexcited **CBz-Bth-BDP**. The fluorescence intensity  
511 of DHR123 ( $10 \mu\text{M}$ ) was measured upon irradiation with a 530 nm PDT Lamp ( $100 \text{ mW cm}^{-2}$ ) at 20  
512 s intervals. The fluorescence intensity ratio ( $F/F_0$ ) of DHR123 at 530 nm was recorded ( $F_0$ : each  
513 compound's fluorescence intensity of DHR123 at 0 s).

514

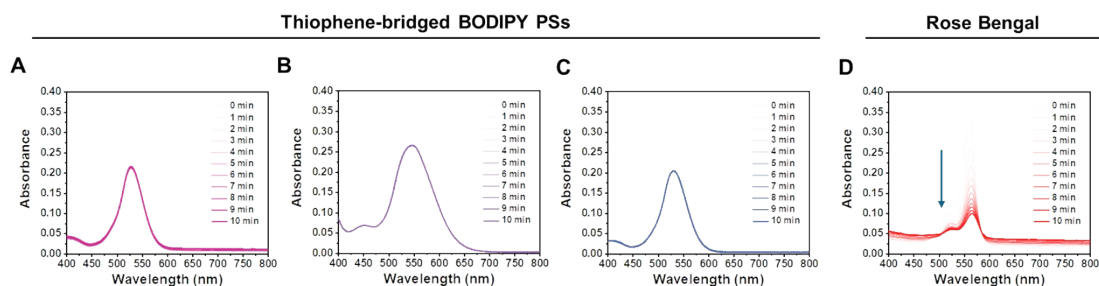

**Figure S30.** Photostability tests of BODIPY PSs (5 uM) in DCM solution under light irradiation (Irradiation time: 1 min interval, irradiation condition: 530 nm PDT Lamp, 100 mW cm<sup>-2</sup>). Photostability was detected by using a UV-Vis spectrometer. Absorbance changes of (A) **Cbz-Bth-BDP**, (B) **DP-Bth-BDP**, (C) **TPA-th-BDP**, and (D) Rose Bengal (RB).

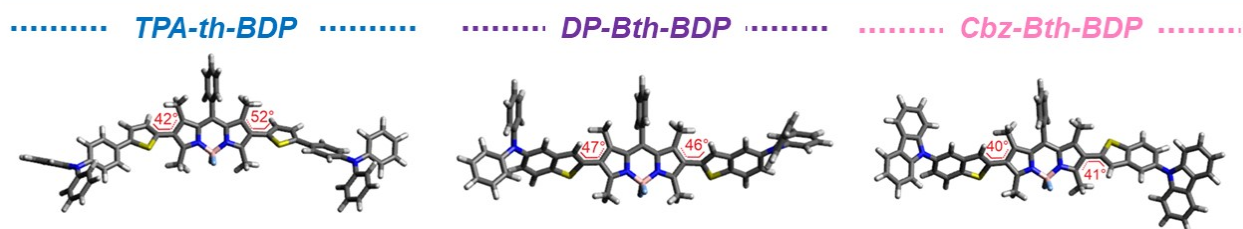

**Figure S31.** Optimized ground state geometries of **TPA-th-BDP**, **DP-Bth-BDP**, and **Cbz-Bth-BDP** in water, with the dihedral angles of the 2 and 6-substituents highlighted in the insets.



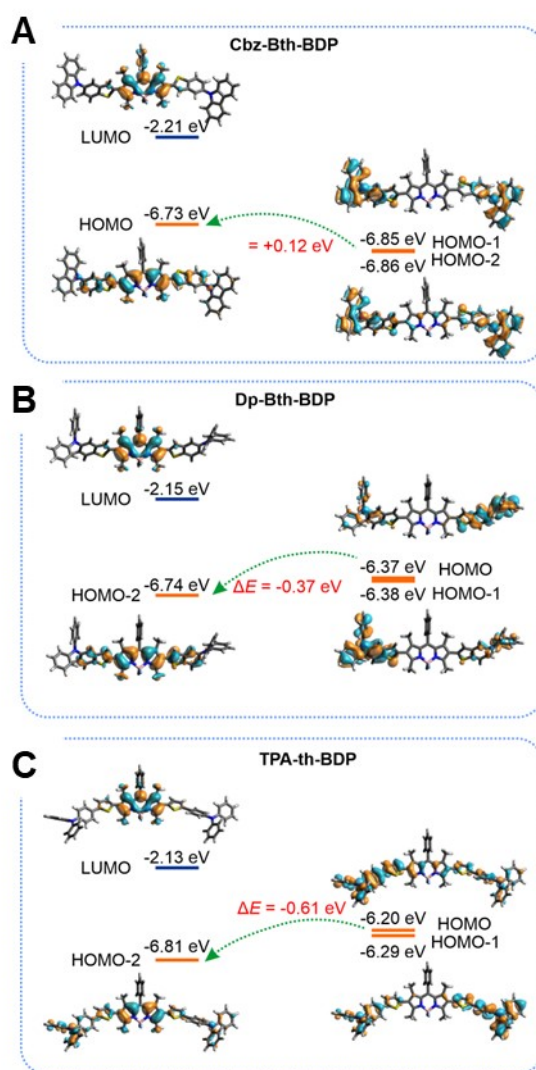

**Figure S32.** Frontier molecular orbitals (FMO) and their energy levels for (A) **Cbz-Bth-BDP**, (B) **DP-Bth-BDP**, and (C) **TPA-th-BDP**, based on the optimized ground state geometries in water. Note that the plotted energy levels are not to scale for clarity.





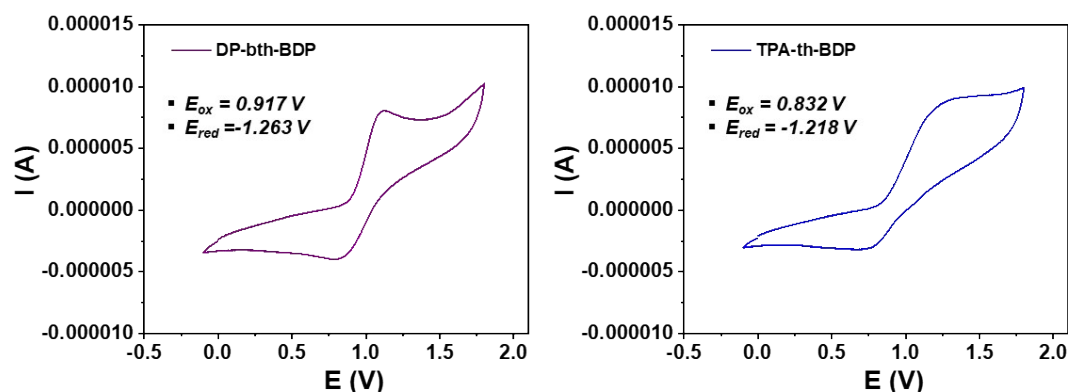

**Figure S35.** Cyclic voltammetry (CV) measurements of **DP-Bth-BDP** (left) and **TPA-th-BDP** (right).

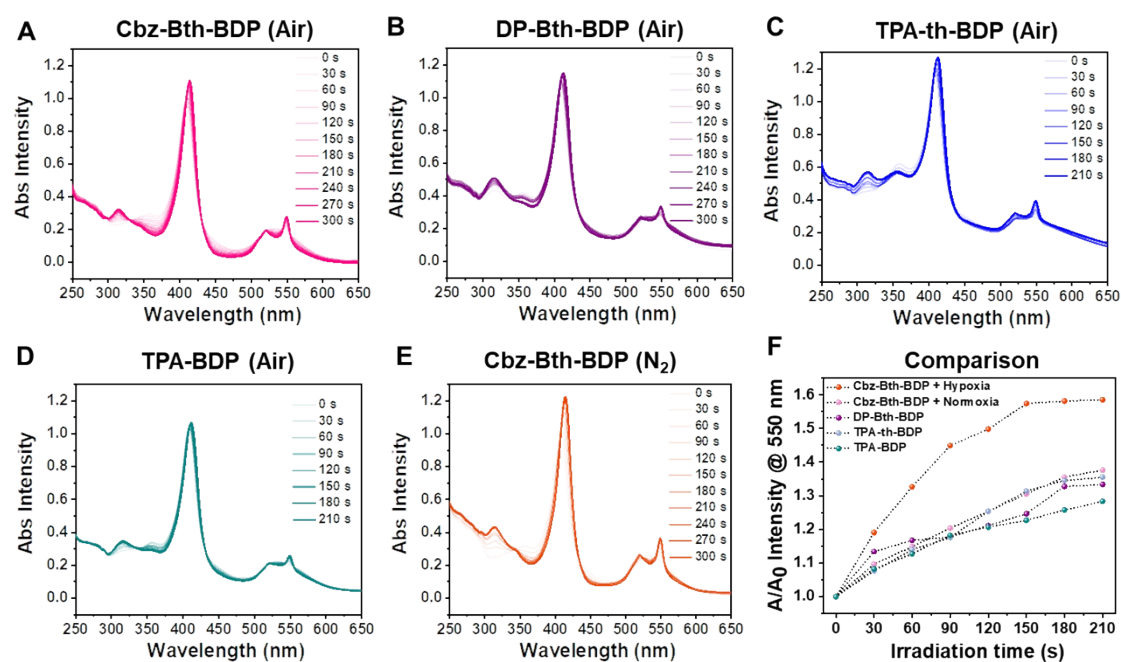

**Figure S36.** Comparison of **BODIPY**-based photosensitizers-mediated cyt *c* photoreduction efficiency. The appearance of new spectral peaks at the  $\beta$  band (520 nm) and the  $\alpha$  band (550 nm) — two characteristic spectroscopic signatures of reduced Cyt *c* ( $Fe^{2+}$ ) — indicates the photoreduction of Cyt *c* ( $Fe^{3+}$ ) to ( $Fe^{2+}$ ). (A-D) Absorbance spectra of cyt *c* upon photoirradiation with (A) **Cbz-Bth-BDP**, (B) **DP-Bth-BDP**, (C) **TAP-th-BDP**, and (D) **TPA-BDP** in aerobic conditions (Air). (E) Absorbance spectra of cyt *c* after photoirradiation with **Cbz-Bth-BDP** in nitrogen ( $N_2$ ) under green light. All photosensitizers were used at a concentration of  $2\text{ }\mu\text{M}$ , with NADH at  $40\text{ }\mu\text{M}$ , and cyt *c* at  $10\text{ }\mu\text{M}$  in aerobic PBS solution. (F) Total comparison of BODIPY PSs-mediated Cyt *c* photoreduction efficiency.

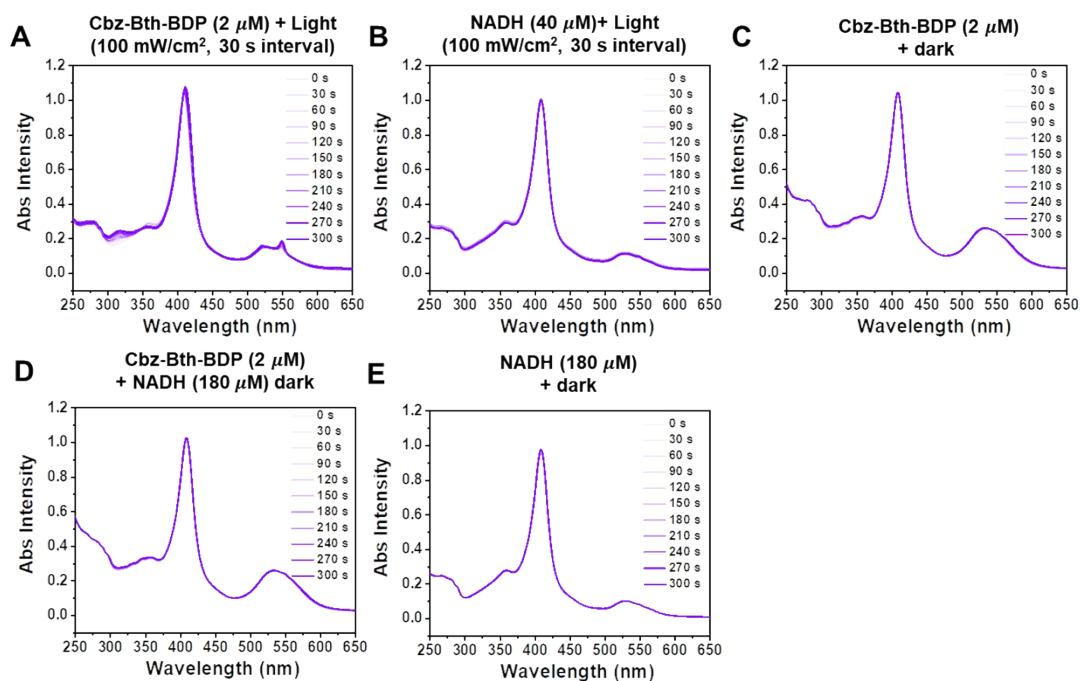

558

559 **Figure S37.** Photocatalytic reduction of Cyt *c* ( $\text{Fe}^{3+}$ ) in the presence and absence of NADH.

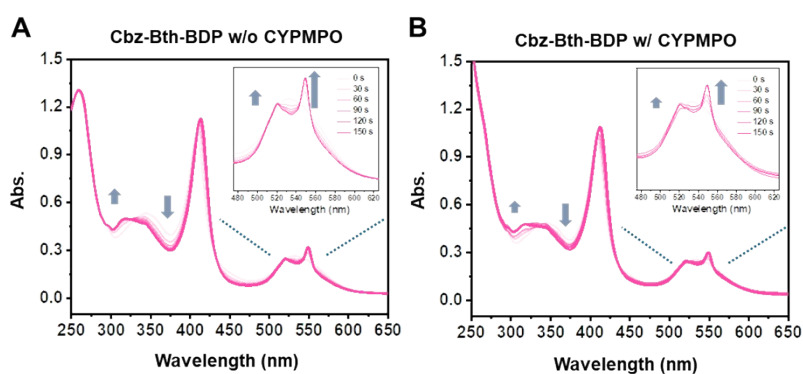

560

561 **Figure S38.** Photocatalytic reduction of Cyt *c* ( $\text{Fe}^{3+}$ ) in (A) the absence or (B) the presence of NAD  
562 radical trapping reagent (CYPMPO).

|          | TON    | TOF<br>( $\text{min}^{-1}$ ) |
|----------|--------|------------------------------|
| Hypoxia  | 2.931  | 0.5862                       |
| Normoxia | 2.2675 | 0.4535                       |

563

564 **Figure S39.** Calculation of TON and TOF

565

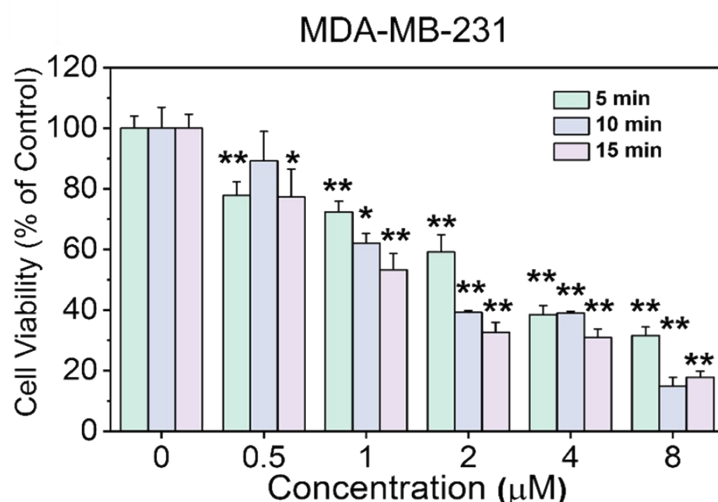

566

567 **Figure S40.** (a) Comparison of cell viability at three different time points (5, 10, and 15 min) after  
 568 treatment with **Cbz-Bth-BDP** at various concentrations (0, 0.5, 1, 2, 4, and 8  $\mu$ M) and followed by  
 569 photo-irradiation. Light power density: 100 mW  $\text{cm}^{-2}$ , irradiation time: 10 min. Bar graphs represent  
 570 the mean cell viability from MTT assays, with error bars indicating standard deviation (SD) values (n  
 571 = 3). \* $p < 0.05$ , \*\*  $p < 0.01$ , and \*\*\* $p < 0.001$ .

572

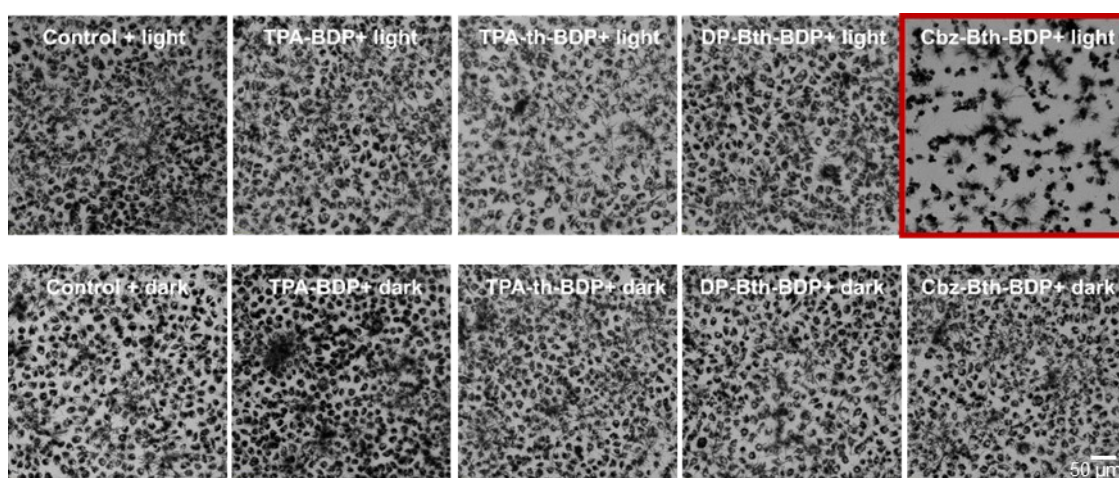

573

574 **Figure S41.** Formazan formation assay in MDA-MB-231 cells with or without light irradiation. MDA-  
 575 MB-231 cells were treated with 2  $\mu$ M of indicated concentrations of heavy-atom-free BODIPY PSs  
 576 (TPA-BDP, **TPA-th-BDP**, **DP-Bth-BDP**, and **Cbz-Bth-BDP**). The formation of formazan was  
 577 detected using an MTT assay. Three independent experimental runs yielded comparable findings.  
 578 Scale bar: 50  $\mu$ m.

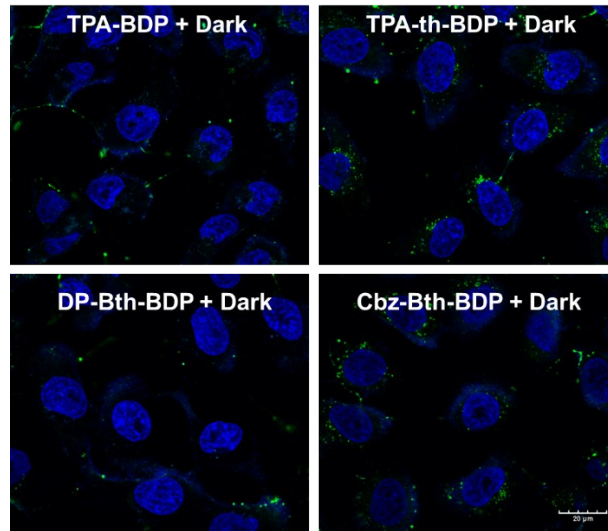

579

580 **Figure S42.** Confocal laser microscopy images showing the pyroptotic morphology changes in MDA-  
 581 MB-231 cells. The cell membrane is stained with FITC-Annexin-V (green), and the nucleus is stained  
 582 with Hoechst 33342 (blue). Scale bar: 20  $\mu$ m.

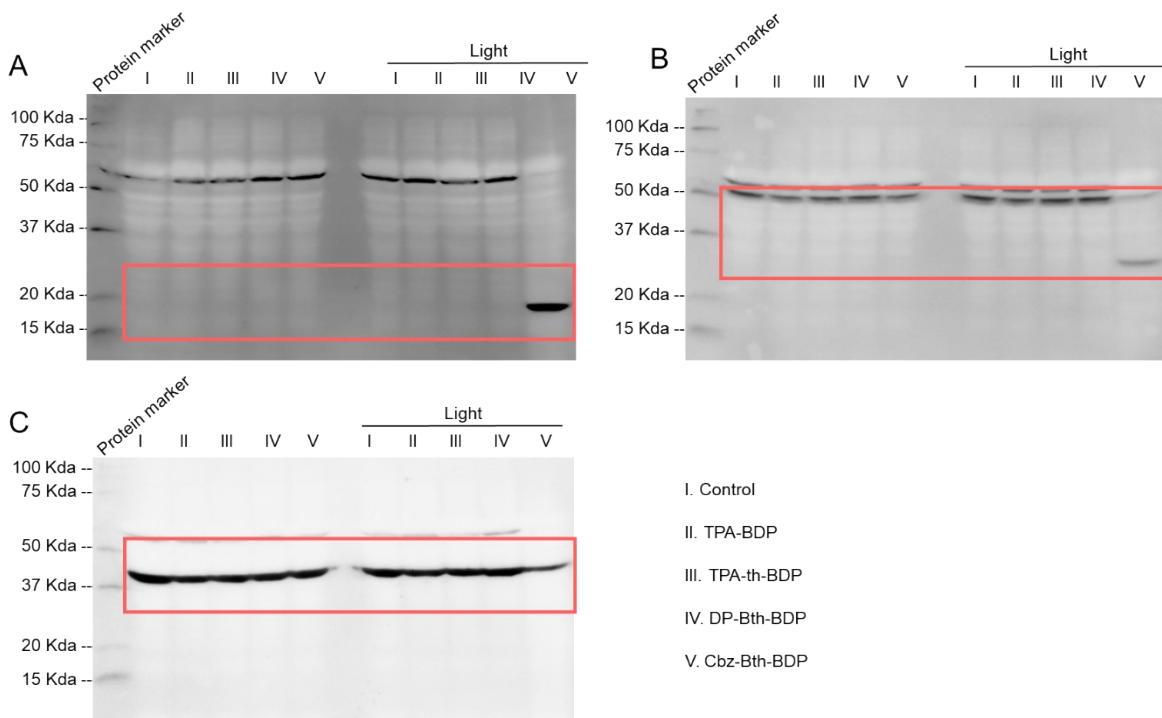

583

584 **Figure S43.** Western blot analysis of pyroptosis-related protein expression levels in MDA-MB-231  
 585 cells treated with BODIPY PSs and light irradiation (530 nm, 100 mW cm<sup>-2</sup>, 10 min). (A) Protein  
 586 expression of cleaved Caspase-3 (active form of caspase 3). (B) Protein expression of GSDME-N (N-  
 587 terminal fragment of gasdermin E, GSDME). (C) Protein expression of  $\beta$ -actin.

588



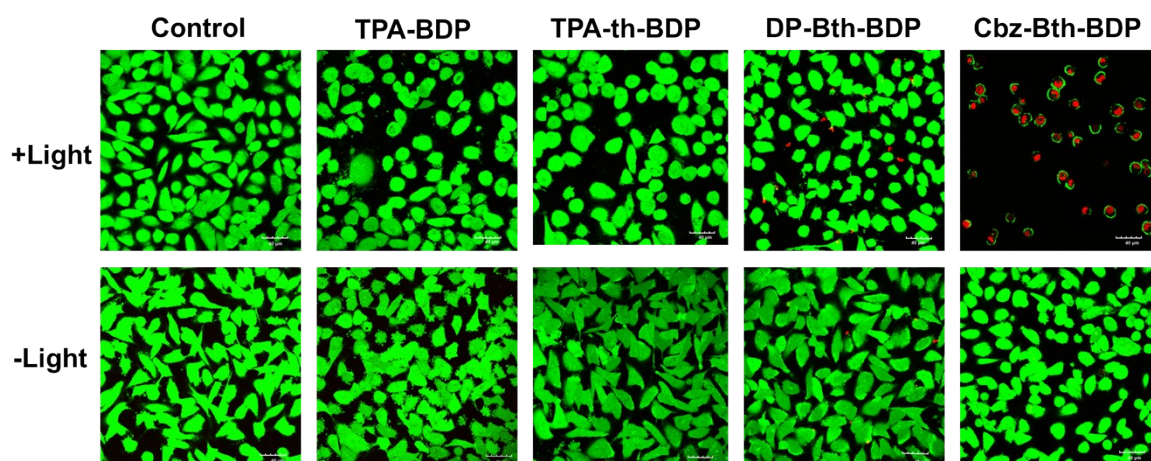

589

590 **Figure S44.** Confocal imaging of live/dead cells in MDA-MB-231 cells. Cells were treated with  $2 \mu\text{M}$   
 591 heavy-atom-free BODIP PSs (TPA-BDP, TPA-th-BDP, DP-Bth-BDP, and Cbz-Bth-BDP) with or  
 592 without light irradiation. Live cells were stained in green by Calcein AM (green,  $\lambda_{\text{ex}} = 473 \text{ nm}$  and  
 593  $\lambda_{\text{em}} = 490\text{-}590 \text{ nm}$ ), and dead cells were stained with propidium iodide (PI) (red,  $\lambda_{\text{ex}} = 559 \text{ nm}$  and  $\lambda_{\text{em}}$   
 594  $= 575\text{-}675 \text{ nm}$ ). Scale bars:  $50 \mu\text{m}$ .

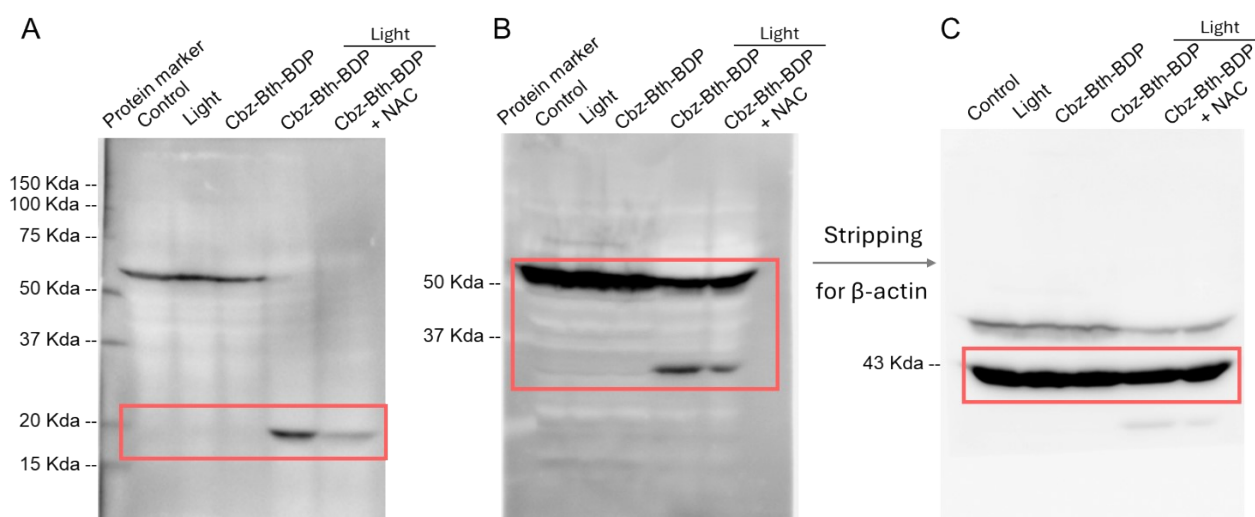

595

596 **Figure S45.** Western blot assay showing pyroptosis-related protein expression after scavenging ROS  
 597 (N-Acetyl-L-cysteine, NAC) with Cbz-Bth-BDP treatment. (A) Protein expression of cleaved  
 598 Caspase-3 (active form of caspase 3). (B) Protein expression of GSDME-N (N-terminal fragment of  
 599 gasdermin E, GSDME) was analyzed, after which the membrane was stripped and reprobed for  $\beta$ -actin  
 600 (C). Light irradiation condition:  $530 \text{ nm}$ ,  $100 \text{ mW cm}^{-2}$ ,  $10 \text{ min}$ .

601

603 **Supplementary Reference**

- 604 [1] J. Wei, Y. Ma, C. Liu, J. Li, J. Shen, K. Y. Zhang, S. Liu, Q. Zhao, *J. Mater. Chem. C* **2021**, 9,  
605 5945–5951.
- 606 [2] I. Partanen, A. Belyaev, B. Su, Z. Liu, J. J. Saarinen, I. Ibni Hashim, A. Steffen, P. Chou, C.  
607 Romero-Nieto, I. O. Koshevoy, *Chem. Eur. J.* **2023**, 29, e202301073.
- 608 [3] F.-Z. Xu, L. Zhu, H.-H. Han, J.-W. Zou, Y. Zang, J. Li, T. D. James, X.-P. He, C.-Y. Wang,  
609 *Chem. Sci.* **2022**, 13, 9373–9380.
- 610 [4] Y. Peng, G. Guo, S. Guo, L. Kong, T. Lu, Z. Zhang, *Angew. Chem. Int. Ed.* **2021**, 60, 22062–  
611 22069.
- 612 [5] V. Nguyen, Y. Yim, S. Kim, B. Ryu, K. M. K. Swamy, G. Kim, N. Kwon, C. Kim, S. Park, J.  
613 Yoon, *Angew. Chem. Int. Ed.* **2020**, 59, 8957–8962.
- 614 [6] K. Teng, W. Chen, L. Niu, W. Fang, G. Cui, Q. Yang, *Angew. Chem. Int. Ed.* **2021**, 60, 19912–  
615 19920.
- 616 [7] M. D. Hanwell, D. E. Curtis, D. C. Lonie, T. Vandermeersch, E. Zurek, G. R. Hutchison, *J.*  
617 *Cheminform.* **2012**, 4, 17.
- 618 [8] A. V. Marenich, C. J. Cramer, D. G. Truhlar, *J. Phys. Chem. B* **2009**, 113, 6378–6396.
- 619 [9] F. Neese, *WIREs: Comput. Mol. Sci.* **2022**, 12, e1606.

620
